1 Mycotoxin exposure biomonitoring in breastfed and non-exclusively  
2 breastfed Nigerian children

3  
4 Chibundu N. Ezekiel<sup>1,2,\*</sup>, Wilfred A. Abia<sup>2,3,4</sup>, Dominik Braun<sup>5</sup>, Bojan Šarkanj<sup>2,6</sup>, Kolawole  
5 I. Ayeni<sup>1</sup>, Oluwawapelumi A. Oyedele<sup>1</sup>, Emmanuel C. Michael-Chikezie<sup>7,8</sup>, Victoria C.  
6 Ezekiel<sup>9</sup>, Beatrice N. Mark<sup>10</sup>, Chinonso P. Ahuchaogu<sup>11</sup>, Rudolf Krska<sup>2,3</sup>, Michael  
7 Sulyok<sup>2</sup>, Paul C. Turner<sup>12</sup> and Benedikt Warth<sup>5,\*</sup>

8 <sup>1</sup>Department of Microbiology, Babcock University, Ilishan Remo, Ogun State, Nigeria. <sup>2</sup>Institute of Bioanalytics and  
9 Agro-Metabolomics, Department of Agrobiotechnology (IFA-Tulln), University of Natural Resources and Life  
10 Sciences Vienna (BOKU), Konrad Lorenzstr. 20, A-3430 Tulln, Austria. <sup>3</sup>Institute for Global Food Security, School of  
11 Biological Sciences, Queen's University Belfast, University Road, Belfast, BT7 1NN, Northern Ireland, United  
12 Kingdom. <sup>4</sup>Laboratory of Pharmacology and Toxicology, Department of Biochemistry, Faculty of Science, University  
13 of Yaounde I, P.O. Box 812, Yaounde, Cameroon. <sup>5</sup>University of Vienna, Faculty of Chemistry, Department of Food  
14 Chemistry and Toxicology, Währinger Str. 38, A-1090 Vienna, Austria. <sup>6</sup>Department of Food Technology, University  
15 North, Center Koprivnica, Trg dr. Zarka Dolinara 1, HR, 48000, Koprivnica, Croatia. <sup>7</sup>Clifford University, Owerinta  
16 (Ihie Campus), Abia State, Nigeria. <sup>8</sup>Benjamin Carson (Snr.) School of Medicine, Babcock University, Ilishan Remo,  
17 Ogun State, Nigeria. <sup>9</sup>Independent Researcher, Ilishan Remo, Ogun State, Nigeria. <sup>10</sup>Department of Community  
18 Health, Babcock University Teaching Hospital, Ilishan Remo, Ogun State, Nigeria. <sup>11</sup>Department of Clinical Sciences,  
19 Babcock University Teaching Hospital, Ilishan Remo, Ogun State, Nigeria. <sup>12</sup>MIAEH, School of Public Health,  
20 University of Maryland, College Park, MD 20742, USA.

21 Corresponding authors:

22 \*Chibundu N. Ezekiel, Department of Microbiology, Babcock University, Ilishan Remo, Ogun State,  
23 Nigeria. Email: [chaugez@gmail.com](mailto:chaugez@gmail.com)

24 \*Benedikt Warth, University of Vienna, Faculty of Chemistry, Department of Food Chemistry and  
25 Toxicology, Währinger Straße 38, 1090 Vienna, Austria. Phone: +43 1 4277 70806. E-mail:  
26 [benedikt.warth@univie.ac.at](mailto:benedikt.warth@univie.ac.at)

## 27 **Abstract**

28 A multi-specimen, multi-mycotoxin approach involving ultra-sensitive LC-MS/MS analysis of  
29 breast milk, complementary food and urine was applied to examine mycotoxin co-exposure in  
30 65 infants, aged 1–18 months, in Ogun state, Nigeria. Aflatoxin M<sub>1</sub> was detected in breast milk  
31 (4/22 (18%)), while six other classes of mycotoxins were quantified; including dihydrocitrinone  
32 (6/22 (27%); range: 14.0–59.7ng/L) and sterigmatocystin (1/22 (5%); 1.2ng/L) detected for the  
33 first time. Seven distinct classes of mycotoxins including aflatoxins (9/42 (21%); range: 1.0–  
34 16.2µg/kg) and fumonisins (12/42 (29%); range: 7.9–194µg/kg) contaminated complementary  
35 food. Mycotoxins covering seven distinct classes with diverse structures and modes of action  
36 were detected in 64/65 (99%) of the urine samples, demonstrating ubiquitous exposure. Two  
37 aflatoxin metabolites (AFM<sub>1</sub> and AFQ<sub>1</sub>) and FB<sub>1</sub> were detected in 6/65 (9%), 44/65 (68%) and  
38 17/65 (26%) urine samples, respectively. Mixtures of mycotoxin classes were common,  
39 including 22/22 (100%), 14/42 (33%) and 56/65 (86%) samples having 2–6, 2–4, or 2–6  
40 mycotoxins present, for breast milk, complementary food and urine, respectively. Aflatoxin  
41 and/or fumonisin was detected in 4/22 (18%), 12/42 (29%) and 46/65 (71%) for breast milk,  
42 complimentary foods and urine, respectively. Furthermore, the detection frequency, mean  
43 concentrations and occurrence of mixtures were typically greater in urine of non-exclusively  
44 breastfed compared to exclusively breastfed infants. The study provides novel insights into  
45 mycotoxin co-exposures in early-life. Albeit a small sample set, it highlights transition to higher  
46 levels of infant mycotoxin exposure as complementary foods are introduced, providing impetus  
47 to mitigate during this critical early-life period and encourage breastfeeding.

48 **Key words:** Children; Biomarkers; Breastmilk; Environmental/Public Health; Food Safety;  
49 Mycotoxins.

## 50 **1. Introduction**

51 Nutrition within the first 1000 days of life is crucial to the growth, development and  
52 performance of children in their later years and into adulthood as postulated in the  
53 'developmental origins of health and disease' (DOHaD) concept (Barker, 2000; Bateson et al.,  
54 2004; Mandy and Nyirenda, 2018). However, the sources of children's diets within this period  
55 may be diverse, and depend on the age of the children. The dietary patterns in a progressive  
56 manner include exclusively consumed breast milk or formula milk, breast milk or formula milk  
57 combined with complementary foods, and exclusively consumed complementary foods. Breast  
58 milk composition varies widely depending on diet, age, lactation stage, number of pregnancies,  
59 and other physiological parameters (Butts et al., 2018; Innis, 2014; Wu et al., 2018). Previous  
60 studies have shown that complementary foods can be made from single or mixed cereals as a  
61 porridge, sometimes in combination with nuts, animal milk and other mashed items, and  
62 additional food groups are added as children get older (Alvito et al., 2010; Chuisseu Njamen et  
63 al., 2018; Kamala et al. 2016; Kimanya et al., 2009, 2010, 2014; Ojuri et al., 2018, 2019).  
64 Unfortunately, in some parts of the world, some commonly consumed foods contain toxic fungal  
65 metabolites known as mycotoxins (Alvito et al., 2010; Braun et al., 2018; Cherkani-Hassani et  
66 al., 2016; Juan et al., 2014; Kamala et al., 2016; Kimanya et al., 2009, 2010, 2014; Chuisseu  
67 Njamen et al., 2018; Ojuri et al., 2018, 2019; Preindl et al., 2019; Warth et al., 2016).

68 Aflatoxin (AF), fumonisin (FUM), ochratoxin A (OTA), deoxynivalenol (DON) and  
69 zearalenone (ZEN) are considered priority mycotoxins and are regulated in food. AFs are  
70 categorized as class 1 human liver carcinogen (IARC, 2002, 2012a). AF is additionally  
71 implicated in growth faltering of infants, (Gong et al., 2002, 2003, 2004, 2012; Turner et al.,  
72 2003, 2007; Watson et al., 2018), possibly associated with interference to micronutrient  
73 absorption, impairment of gut integrity, liver homeostasis or effects on the IGF-growth axis

74 (IARC, 2015; Turner, 2013; Watson et al., 2018). FUM intake has been associated with the  
75 incidence of esophageal cancer (Chu et al., 1994; Sun et al., 2007, 2011; Yoshizawa et al.,  
76 1994), birth defects (Missmer et al., 2006), and suggested to play a role in child growth faltering  
77 (Shirima et al., 2015). OTA is linked to renal toxicity (Heussner and Bingle, 2015), while immune  
78 system modulation was reported for trichothecenes such as DON (Pestka, 2010). Furthermore,  
79 *in vitro* data suggest interactions of regulated mycotoxins with emerging ones such as alternariol  
80 (AOH) and its methylated ether form (alternariol monomethyl ether; AME), beauvericin (BEA),  
81 enniatins and moniliformin (MON) (Aichinger et al., 2019; Vejdovszky et al., 2017a, 2017b;  
82 Woelflingseder, 2019).

83 Complementary foods can be contaminated with mycotoxins (Cappozzo et al., 2017;  
84 Chuisseu Djamen et al., 2018; Juan et al., 2014; Kimanya et al., 2009, 2010, 2014; Kolakowski  
85 et al., 2016; Ojuri et al., 2018, 2019; Oueslati et al., 2018), and ingested mycotoxins or their  
86 metabolites may be found in various bio-fluids including blood, urine and breast milk (Ayelign et  
87 al., 2017; Braun et al., 2018; Chen et al., 2017; Cherkani-Hassani et al., 2016; Ediage et al.,  
88 2013; Ezekiel et al., 2014; Ferrufino-Guardia et al., 2019; Gerding et al., 2015; Heyndrickx et al.,  
89 2015; Papageorgiou et al., 2018; Polychronaki et al., 2008; Sanchez and Diaz, 2019;  
90 Schwartzbord et al., 2016; Shirima et al., 2015; Turner et al., 2012a; Warth et al., 2016). Only a  
91 limited number of studies have assessed mycotoxin exposure in Nigerian children using  
92 biomarkers of exposure (Adejumo et al., 2013; Braun et al., 2018; Ezekiel et al., 2014, 2018b;  
93 McMillan et al., 2018; Sarkanj et al., 2018)-.

94 This study aimed at elucidating mycotoxin co-exposure patterns in infants using three  
95 measures (food, breast-milk and urine), all with comprehensive quantitative and ultra-sensitive  
96 mycotoxin analysis, to compare exposure levels in exclusively breastfed (EB) with non-  
97 exclusively breastfed (NEB) infants. Importantly, several classes of mycotoxins were examined,  
98 for example aflatoxins, and in bio-fluids (milk or urine) metabolites of such mycotoxins may also

99 be observed in addition or instead of the parent class of toxin, for example aflatoxin M1 or Q1.  
100 These metabolites would not be observed in the original food.

101

## 102 **2. Materials and methods**

### 103 **2.1 Study area and population**

104 The study population was 65 infants aged 1–18 months from Ilishan and Ikenne in Remo  
105 land of Ogun state (south-western Nigeria). Both are small sister communities within 1 km  
106 distance of each other, with rich diversity of foods available in households. Both communities  
107 are semi-urban due to the presence of campuses of tertiary institutions and they share similar  
108 characteristics as detailed below. Indigent families in these communities are farmers and  
109 traders, and both communities consist of approximately 15,000 residents (Ezekiel et al., 2018b).  
110 The food sources for families are local markets, small stores and own farms. Major foods  
111 consumed are cereals (rice, maize, wheat), tubers (cassava and yam), and peanuts, melon  
112 seed and cowpea. The dietary patterns for infants in both communities involve exclusive  
113 breastfeeding (feeding infants with only breast milk for at least six months from birth) and non-  
114 exclusive breastfeeding (the introduction of complementary foods to breastfed infants  
115 sometimes from the first month after birth). Dietary pattern depends on family income, mother's  
116 health and work status, and knowledge on breastfeeding practices. A majority of the families  
117 associated with tertiary institutions in both communities practice exclusive breastfeeding.

### 118 **2.2 Sampling design and ethical considerations**

119 This pilot, cross-sectional survey was conducted between January and February 2016.  
120 Families that participated were identified through local health centres and post-natal clinics in  
121 the two communities where mother/infant pairs were registered. The study consisted of two  
122 cohorts: exclusively breastfed (EB) children (age: 1–6 months) and non-exclusively breastfed  
123 (NEB) children (age: 3–18 months) to which 23 and 42 children (male/female ratio = 31:34)

124 were recruited, respectively. A total of 50 and 15 infants were recruited into the study from  
125 Ilishan and Ikenne communities, respectively. The inclusion criteria for this study were age of  
126 infants and dietary patterns for each cohort as well as healthy status of infants. The age of  
127 infants recruited into the study were ascertained from their health records. Dietary patterns  
128 (exclusively breast milk consumption in EB cohort *versus* consumption of breast milk and  
129 complementary food in NEB cohort) were ascertained from the mothers. Infants with known  
130 medical conditions (e.g., jaundice, HIV positive or visibly malnourished) were excluded during  
131 the recruitment stage as it was the purpose of this study to investigate typical background  
132 exposure levels and compare EB with NEB rather than targeting the impact of exposure on  
133 health status. Prior to recruitment or inclusion into the study, the mother of each child was  
134 informed in her preferred language (English or Yoruba) on the purpose of the study. Only  
135 mothers who signed the informed consent document (and on behalf of their infant) to participate  
136 in the research were included into the study.

137 Complementary foods were obtained as “plate-ready” samples ( $n=42$ ; 50 g each), by a  
138 trained team member, for the NEB children ( $n=42$ ) on the day prior to infant urine sample  
139 collection. The food samples collected included industrially-processed infant cereal ( $n=6$ ),  
140 fermented maize gruel *ogi* ( $n=26$ ) and *tombran* (home-made pudding from mixed cereal and  
141 nut;  $n=10$ ). One food sample representing the most frequently consumed food in a day was  
142 collected per infant. Breast milk samples ( $n=22$ ; 3–5 mL each), considered as food for the EB  
143 infants, were collected from mothers of EB infants on the day preceding the sampling of infant  
144 urine. Complementary food and breast milk sample collections on the day prior to infant urine  
145 sampling were necessary in order to ensure adequate metabolism and transfer of toxins into  
146 urine. One mother did not provide breast milk sample due to intake of medications. Other details  
147 of sampling and handling of the breast milk samples were described by Braun et al. (2018). In  
148 this paper, the breast milk samples have been previously analysed for mycotoxins utilizing a  
149 less sensitive method. In addition, some of the data from the mother-infant pairs with exclusively

150 breastfed infants were used in a recent correlation study by Braun et al. (*in revision*) that added  
151 longitudinal aspects and urinary exposure measurements of the mothers.

152 First morning urine samples (10–40 mL each) were collected in 50 falcon tubes from all  
153 65 infants recruited into the study by the mothers, using their experience and knowledge of the  
154 time at which their infant pass urine in the morning. All samples (plate-ready complementary  
155 food, breast milk and urine) were immediately frozen at  $-20^{\circ}\text{C}$  and sent by courier on dry ice to  
156 Austria for LC-MS/MS analyses.

157 Ethical permission for this study was granted by the Babcock University Health  
158 Research Ethics Committee under two approval numbers: BUHREC294/16 for the EB children  
159 and BUHREC156/15 for the NEB children. In adherence to ethical standards, all samples were  
160 blinded and coded to exclude participant information prior to analytical measurements.

### 161 **2.3 Demographic, dietary and health status questionnaire**

162 Each mother received a copy of a well-structured questionnaire for completion prior to  
163 food, breast milk and urine sample collection. Copies of the questionnaire were administered by  
164 trained interviewers and translation to the local language (Yoruba) was available on request of  
165 some mothers. The administered questionnaire was designed to elicit information on participant  
166 demography, family socio-economic status, individual dietary preferences, food consumption  
167 frequencies and quantities, and associated health implications among the infants.

### 168 **2.4 Mycotoxin determination in breast milk samples**

169 Mycotoxins were quantified in breast milk samples as described in Braun et al. (2020).  
170 Briefly, each homogenized breast milk sample (1 mL) was extracted using 1 mL acidified ACN  
171 (1% formic acid) on a shaker for 3 min, followed by addition of anhydrous magnesium sulfate  
172 (0.4 g) and sodium chloride (0.1 g). Sequel to two rounds of cold centrifugation ( $4,750 \times g$  at  
173  $10^{\circ}\text{C}$  for 10 min;  $14,000 \times g$ ,  $4^{\circ}\text{C}$  for 2 min), a SPE clean up step using SPE column (Oasis  
174 PRiME HLB<sup>®</sup>, Waters, Milford, MA, USA) followed. Mycotoxins were then concentrated on a  
175 vacuum concentrator (Labconco, Missouri, USA) prior to reconstitution using 81  $\mu\text{L}$  MeOH/ACN

176 and 9  $\mu\text{L}$  of the internal standard mixture. Mycotoxins in breast milk samples were measured on  
177 a Sciex QTrap 6500<sup>+</sup> LC-MS/MS system (Foster City, CA, USA) equipped with a Turbo-V™  
178 electrospray ionization (ESI) source coupled to an Agilent 1290 series UHPLC system  
179 (Waldbronn, Germany). Analytes were separated on an Acquity HSS T3 column (2.1×100mm;  
180 Waters, Vienna, Austria) with 1.8  $\mu\text{m}$  particle size at 40 °C. ESI-MS/MS was performed in  
181 scheduled multiple reaction monitoring (MRM) mode using fast polarity switching. For each  
182 analyte two individual mass transitions were acquired.

183 The analytical method was in-house validated according to the European Commission  
184 Decision 2002/657/EC (EC 2002) and the EuraChem Laboratory Guide (Magnusson, 2014).  
185 Limits of detection (LOD) and quantification (LOQ) are reported in Table 2 and the relative  
186 standard deviation as obtained during validation was below 9% for all mycotoxins when spiked  
187 approximately at their respective LOQ value (Braun et al., 2020). Quality control measures in  
188 routine analysis include a pooled non-spiked breast milk sample and three breast milk samples,  
189 which are fortified with authentic reference standards at the same concentration levels as during  
190 method validation to ensure proper extraction efficiency and instrumental performance.

## 191 **2.5 LC-MS/MS-based mycotoxin analysis of food samples**

192 Plate-ready complementary food samples were analysed for the presence of multiple  
193 mycotoxins according to the dilute and shoot LC-MS/MS-based method described by Sulyok et  
194 al. (2020). This method covers the detection of more than 500 metabolites, inclusive of  
195 mycotoxins, in food samples. Briefly, 5 g of each food sample was extracted with 20 mL of  
196 acetonitrile/water/acetic acid 79:20:1, (v/v/v) in a 50 mL polypropylene tube (Sarstedt,  
197 Nümbrecht, Germany) for 90 min on a GFL 3017 rotary shaker (GFL, Burgwedel, Germany).  
198 Afterwards, the extract was diluted 1:1 (v/v) in dilution solvent (acetonitrile/water/acetic acid  
199 20:79:1, v/v/v) prior to measurement on a Sciex QTrap 5500 LC-MS/MS System (Applied  
200 Biosystem, Foster City, CA, USA) equipped with TurbolonSpray electrospray ionisation (ESI)  
201 source and a 1290 Series HPLC System (Agilent, Waldbronn, Germany). Chromatographic



202 separation was performed at 25°C on a Gemini® C18-column, 150×4.6 mm i.d., 5 µm particle  
203 size, equipped with a C18 4×3 mm i.d. security guard cartridge (Phenomenex, Torrance, CA,  
204 USA). ESI-MS/MS was performed in the scheduled MRM mode both in positive and negative  
205 polarities in two separate chromatographic runs per sample by scanning two fragmentation  
206 reactions per analyte. The MRM detection window of each analyte was set to its expected  
207 retention time  $\pm 20$  and  $\pm 26$  s in the positive and the negative modes, respectively. The  
208 identification of each positive analyte was confirmed when two MRMs per analyte was obtained  
209 (EC, 2002). Further details on the method performance are described in Sulyok et al. (2020).

210 The analytical method has been fully validated following the SANTE Guide (SANTE,  
211 2018) for multi-residue analysis and published (Sulyok et al., 2020). The latter reference is  
212 available open access and provides full information on all data on method performance. The  
213 ongoing quality control of the method involves participation in a proficiency testing scheme  
214 organized by BIPEA. Furthermore, a quality control check sample is included in each analytical  
215 sequence. The extended measurement uncertainty has been determined to be 50% (Stadler et  
216 al., 2018).

## 217 **2.6 Urinary mycotoxin measurements by UPLC-MS-MS**

218 Mycotoxins in the urine samples were determined following a stable-isotope dilution  
219 assay-based LC-MS/MS method described in detail by Šarkanj et al. (2018). Briefly, each urine  
220 sample was centrifuged for 3 min at 5600 x g, then treated  $\beta$ -glucuronidase from *E. coli* Type  
221 IX-A (Sigma-Aldrich, G7396-2MU) of prior to a SPE cleanup on Oasis PRiMEHLB® SPE  
222 columns (Waters, Milford, MA, USA). Extracts were then evaporated under nitrogen,  
223 reconstituted with 470 µL dilution solvent (10% acetonitrile, 0.1% glacial acetic acid) and fortified  
224 with 30 µL of an IS mixture. Measurement of mycotoxins in urine samples was performed on a  
225 Sciex QTrap 6500+ LC-MS/MS system (Foster City, CA) equipped with a Turbo-V™ ESI source  
226 coupled to an Agilent 1290 series UHPLC system (Waldbronn, Germany). Analytes were  
227 separated on an AtlantisT3 HSS column (2.1×100mm; Waters, Wexford, Ireland) with 1.8 µm

228 particle size at 35 °C. ESI-MS/MS was performed in scheduled MRM mode and with a 180 sec  
229 detection window. At least two individual transitions were monitored for each analyte.

230 The analytical method was in-house validated according to the European Commission  
231 Decision 2002/657/EC (EC, 2002). LOD and LOQ values are presented in Table 4. Inter-day  
232 relative standard deviation during method validation was calculated to be below 33% for all  
233 mycotoxins included in this assay (Šarkanj et al., 2018). During routine analysis, QC samples  
234 were assessed on a regularly basis to ensure proper sample preparation and instrumental  
235 performance. After each 20 experimental samples a pooled fortified and non-fortified ('blank')  
236 urine sample were measured.

## 237 **2.7 Data analysis**

238 The IBM SPSS Statistics v21.0 (SPSS, Inc., Chicago, IL, USA) was applied in the  
239 analyses of all data. A scatter plot was created for the percentage increases in frequencies and  
240 means of urinary mycotoxins between the two cohorts of children. For comparison of urinary  
241 mycotoxin levels in the population, means were separated by the Duncan's Multiple Range test  
242 (DMRT) and tested for significance by analysis of variance (ANOVA) at  $\alpha = 0.05$ . For the  
243 comparison of all other data between the two cohorts of children in the study, the independent  
244 sample *t*-test using the Levene's test for equality of variances were applied to test for  
245 significance at  $\alpha = 0.05$ .

246

## 247 **3. Results**

### 248 **3.1 Demography and food preference of children**

249 The demographic characteristics of the infants as well as their food consumption data  
250 are given in Table 1. The NEB infants were significantly ( $p < 0.01$ ) older ( $9.0 \pm 3.6$  months) and  
251 heavier ( $8.0 \pm 1.6$  Kg;  $p < 0.05$ ) than the EB children ( $3.7 \pm 1.6$  months and  $6.3 \pm 1.0$  Kg,

252 respectively). All infants received breast milk at least once daily, with higher consumption  
253 frequency of 8–10 times per day in the EB cohort compared to 1–3 times per day in the NEB  
254 cohort who received complementary food at least thrice per day. NEB infants received a variety  
255 of foods, which in most cases (>90%) included infant cereal (mix of animal milk with maize, rice,  
256 or wheat), *ogi* (fermented maize gruel) and *tombran* (mixed cereal and nut pudding).

### 257 **3.2 Occurrence of mycotoxins in breast milk**

258 Breast milk samples were examined for the presence of 34 mycotoxins (or their  
259 metabolites), of which nine were observed. All 22 breast milk samples contained mycotoxins  
260 although mostly at very low concentrations (Table 2). The most frequently detected mycotoxins  
261 were BEA (incidence: 100%; range: 1.0–12.0 ng/L; mean: 3.0 ng/L) and AME (incidence: 96%;  
262 range: 0.5–11.7 ng/L; mean: 3.0 ng/L), whereas DHC (incidence: 27%; range: 14.0–59.7 ng/L;  
263 mean: 25.2 ng/L) and OTA (incidence: 64%; range: 2.0–67.6 ng/L; mean: 9.6 ng/L) had higher  
264 mean levels than all other mycotoxins found in the samples. AFM<sub>1</sub> was the only aflatoxin  
265 metabolite detected in breast milk, occurring in 18% of the samples at levels below the LOQ;  
266 thus, the data points were assigned LOQ/2 values of 2.0 ng/L (Table 2). Enniatins (EnnB and  
267 EnnB<sub>1</sub>) occurred in 77% of the samples, with EnnB dominating in 73% of samples at mean  
268 concentration of 5.0 ng/L (range: 0.7–10.1 ng/L). Sterigmatocystin (STER) was detected in one  
269 sample at 1.2 ng/L. The chromatograms of DHC and STER detected in breast milk are shown in  
270 Figure 1 (C–D).

### 271 **3.3 Distribution of mycotoxins in plate-ready complementary food**

272 Sixty-five fungal metabolites, of which 14 were mycotoxins (Table 3), and 25 other  
273 secondary metabolites (Table S1) were quantified in the samples of plate-ready complementary  
274 food. Aflatoxin B<sub>1</sub>, B<sub>2</sub> and G<sub>1</sub> were detected, but not AFG<sub>2</sub>. Total AFs contaminated 21% of food  
275 samples of which the mean was 6.0 µg/kg (range: 1.0–16.2 µg/kg). The mean level of AFG<sub>1</sub> (12  
276 µg/kg) deriving from two *ogi* samples was three-fold higher than that of AFB<sub>1</sub> (3 µg/kg). The

277 incidence of FUM (sum of fumonisins B series (B<sub>1</sub> and B<sub>2</sub>) was 29%, of which the mean was:  
278 48.8 µg/kg (range 7.9–194 µg/kg). BEA (incidence: 79%; mean: 3.8 µg/kg) was the most  
279 frequently detected mycotoxin in the food samples. Enniatins, ZEN, MON and DON also  
280 occurred in 19, 10, 7 and 5% of the foods, respectively. With respect to occurrence of the toxins  
281 in food types, the highest mean concentrations of BEA (19.4 µg/kg), enniatins (9.6 µg/kg) and  
282 FUM (63.1 µg/kg), were found in infant cereal. Of the three food types, *ogi* contained the highest  
283 mean levels of AF (6.5 µg/kg) and DON (61.5 µg/kg). AF and MON were not found in infant  
284 cereal. *Ogi* and *tombran* contained more diverse mycotoxins than infant cereal (Table 3).

### 285 **3.4 Mycotoxins in urines of infants**

#### 286 **3.4.1 Overview of the distribution of mycotoxins in infant urines**

287 At least one mycotoxin was detected in 64/65 (99%) of the urine samples, with 10  
288 distinct mycotoxins observed, including aflatoxins (AFM<sub>1</sub> and AFQ<sub>1</sub>), fumonisin B<sub>1</sub>, DON, DHC,  
289 NIV, OTA, zearalenones (ZEN, α-ZEL, and β-ZEL), representing seven classes of mycotoxin  
290 (Table 4). The detected aflatoxins were two metabolites: AFM<sub>1</sub> (6/65, 9% of samples; mean of  
291 detected (MoD): 140 ng/L; range: 23–505 ng/L) and AFQ<sub>1</sub> (44/65, 68% of samples; MoD: 210  
292 ng/L; range: 3–898 ng/L). Two infants had only AFM<sub>1</sub> detected, with no AFQ<sub>1</sub>, thus in total 46/65  
293 (71%) of the infants had been exposed to dietary aflatoxin. Only one of the fumonisin class of  
294 mycotoxins was detected, FB<sub>1</sub> (17/65, 26% of samples; MoD: 380 ng/L; range: 35–1587 ng/L).  
295 OTA, ZEN, DON and DHC were also frequently detected (Table 4). The chromatograms of  
296 AFQ<sub>1</sub> and DHC detected in urine are given in Figure 1(A–B). Mycotoxins in urine were higher in  
297 females versus males, though no statistically significant differences in frequency or  
298 concentration for individual toxins was observed (data not shown).

299

#### 300 **3.4.2 Mycotoxins in exclusively breastfed (EB) and non-exclusively breastfed (NEB) infants'** 301 **urine**

302 Eight of the 10 mycotoxins were observed frequently in NEB infants compared to EB  
303 infants: AFM<sub>1</sub> (12 vs 4%), DON (55 vs 30%), DHC (74 vs 26%), FB<sub>1</sub> (31 vs 17%), OTA (38 vs  
304 26%), ZEN (83 vs 57%), respectively, and NIV and  $\alpha$ -ZEL which were only detected in NEB  
305 infants' urine (Table 4). The recorded detection frequencies of the mycotoxins resulted in a 46–  
306 300% increase from EB to NEB cohorts (Figure 2). There were however reductions in the  
307 frequencies of detection for AFQ<sub>1</sub> (NEB: 53 vs EB: 87%) and  $\beta$ -ZEL (NEB: 14 vs EB: 30%). The  
308 mean concentrations in urine with detectable mycotoxins were higher, for seven of the 10  
309 mycotoxins, in NEB versus EB infants: AFM<sub>1</sub> (166 vs 23 ng/L), AFQ<sub>1</sub> (225 vs 182 ng/L), DON  
310 (5,282 vs 3,194 ng/L), DHC (202 vs 135 ng/L), FB<sub>1</sub> (454 vs 136 ng/L), NIV (161 ng/L vs non-  
311 detect) and  $\alpha$ -ZEL (20 ng/L vs non-detect), respectively, see Table 4; resulting in 124–721%  
312 increase (Figure 2). However, significant ( $p<0.05$ ) higher mean levels were only recorded for  
313 AFQ<sub>1</sub>, DON, DHC and FB<sub>1</sub> in favour of NEB infants, and for OTA in favour of EB infants (Table  
314 4).

### 315 **3.5 Mycotoxin co-occurrence and co-exposures**

316 The numbers of different classes of mycotoxins detected in each of breast milk,  
317 complementary food and urine were determined (Table 5). All breast milk samples contained  
318 more than one and up to five mycotoxin classes; 41% of samples had four or more different  
319 mycotoxins detected, though overall mycotoxin concentrations were low. The primary  
320 combinations in the mycotoxin mixtures in breast milk included AME, BEA, enniatins and OTA.  
321 Aflatoxins were observed as part of 4/22 (18%) mixtures of toxins. Fumonisin in breast milk  
322 were not measured in the present study.

323 Mycotoxin mixtures, of 2–5 toxins, were observed in just over half (22/42; 52%) of the  
324 plate-ready complementary food samples. The observed mixtures in the complementary food  
325 samples predominantly involved three classes of mycotoxins: BEA in 12 mixtures, FUM in nine  
326 mixtures and AF in eight mixtures. Of these mixtures, five samples with three or more toxins  
327 contained both AF and FUM.

328 Mixtures of 2–6 mycotoxins were observed in about 86% of the urines, with NEB  
329 typically having more urine samples with mixtures (93%, with 2–6 toxins) compared to EB  
330 infants (74% with 2–5 toxins). The most frequently occurring classes of toxins in mixtures were  
331 ZEN (45/65; 69%), AF (42/65; 65%), DHC (41/65; 63%) and DON (30/65; 46%). AF and FUM in  
332 the same urine occurred in 13/65 (20%). One infant from the NEB cohort was co-exposed to  
333 seven mycotoxins and metabolites belonging to six of the assessed mycotoxin classes except  
334 NIV (Figure 3).

335 Paired frequencies of mycotoxin detected in the matrices from each cohort were  
336 compared. In the EB cohort, contamination frequencies in breast milk and urine were  
337 AFM<sub>1</sub>/AFM<sub>1</sub> (18%/4%), AFM<sub>1</sub>/AFQ<sub>1</sub> (18%/87%), DHC (27%/26%) and OTA (64%/26%). The  
338 contamination frequencies in complementary food vs urine in the NEB cohort were AFB<sub>1</sub>/AFM<sub>1</sub>  
339 (27%/12%), AFB<sub>1</sub>/AFQ<sub>1</sub> (27%/57%), DON (5%/55%), FB<sub>1</sub> (29%/31%) and ZEN (10%/83%).

340

#### 341 **4. Discussion**

342 Infants' transition from breastfeeding to complementary food is an essential nutritional  
343 requirement. However, it is important to understand if this transition creates opportunities for  
344 differential exposure to diverse classes of fungal toxins and also other food and environmental  
345 contaminants (i.e., the exposome). The diversity of mycotoxins in breast milk is still in the  
346 exploratory stage, though several mycotoxins have been observed, most notably aflatoxins;  
347 however, food measurements are by far more established to date despite several limitations  
348 (IARC, 2012a, 2012b, 2015). This study provides a measure of multiple mycotoxins in both  
349 breast milk and plate-ready complementary foods, and then compares patterns of these  
350 mycotoxins in urine from infants that are either EB or partially receiving breast milk and  
351 complementary foods, NEB.

352 In this study, the analytical sensitivity for measuring mycotoxins in breast milk was  
353 extremely high (low LOD), and thus the frequency of toxin detection was quite high, providing  
354 unique insights into chronic background level exposure patterns. All 22 samples had two or  
355 more toxins, though overall the concentrations would be regarded as low. The lipophilic  
356 aflatoxins such as AFB<sub>1</sub> or AFG<sub>1</sub> are commonly detected in grains in sub-Saharan Africa  
357 (Ezekiel et al., 2018a), but were not observed in breastmilk. The AFB<sub>1</sub> metabolite, AFM<sub>1</sub>, was  
358 observed in four samples and at a level below the LOQ (4 ng/L). This data suggests that breast  
359 milk is not providing significant exposure to the most carcinogenic of the mycotoxins for  
360 participants of this study. AFM<sub>1</sub> in breast milk occurred at lower mean concentrations than those  
361 previously reported from Sierra Leone (800 ng/L, Jonsyn et al., 1995), Egypt (60 ng/L,  
362 Polychronaki et al., 2007), Nigeria (35 ng/L, Adejumo et al., 2013) and Ecuador (45 ng/L, Ortiz  
363 et al., 2018), but similar to levels reported in two samples from Brazil (0.3 and 0.8 ng/L, Iha et  
364 al., 2014).

365 Prior to the present study, there were no reports on the occurrence of CIT and its  
366 metabolites as well as STER in human breast milk (Ali and Degen, 2019; Cherkani-Hassani et  
367 al., 2016; Warth et al., 2016). Thus, to the best of our knowledge, we present the first report of  
368 DHC and STER occurrences in human breast milk. DHC, mostly considered a detoxification  
369 product of CIT but also co-detected with CIT in food samples (Ezekiel et al., 2020; Ojuri et al.,  
370 2018, 2019), is indicative of CIT exposure (Ali and Degen, 2019; Follmann et al., 2014). The  
371 concentrations of DHC in breast milk samples analyzed in the present study were low, and as  
372 much as 10 times lower than the concentrations found in urine. However, the presence of DHC  
373 in both biological fluids compel us to hypothesize that CIT intake is common in Nigeria (Akinfala  
374 et al., 2020; Ezekiel et al., 2020; Ojuri et al., 2018, 2019). Furthermore, it agrees with the  
375 suggestions of Ali and Degen (2019) who retrospectively estimated high CIT exposure  
376 assessment/intake above the “level of no concern for nephrotoxicity” of 0.2 µg/kg bwt/day set by  
377 EFSA (EC, 2014; EFSA, 2012) in participants in a previous urinary biomarker study in Nigeria

378 (Šarkanj et al., 2018). Due to sparse data on its occurrence and toxicity, there is no regulation  
379 on maximum levels (ML) of STER in food, including infant diets, in most countries, Nigeria  
380 inclusive (EC, 2006; Oplatowska-Stachowiak et al., 2018). Nonetheless, this mycotoxin may be  
381 carcinogenic in humans (EFSA, 2013; IARC, 1987), as such, its detection in breast milk  
382 samples provides a basis for the consideration of more investigations into the occurrence and  
383 regulation of this mycotoxin in foods intended for infants and young children.

384         The mean level of the nephrotoxic OTA in the analyzed breast milk was 50 times lower  
385 than the maximum tolerable limit of 500 ng/L set for infant food in Europe (EC, 2006).  
386 Additionally, the recorded level was four to five times lower than those reported in Chile (mean:  
387 44 ng/L, Munoz et al., 2014) and Bolivia (mean: 53 ng/L, Ferrufino-Guardia et al., 2019) but  
388 nearly two times higher than the mean level reported in Italy (mean: 6.0 ng/L, Turconi et al.,  
389 2004). The identification of BEA and EnnB in human breast milk agrees with previous reports  
390 from Spain (Rubert et al., 2014) and Nigeria (Braun et al., 2018). The mean concentration of  
391 AME in the present study is, however, lower than the mean level (11.5 ng/L) in a previous study  
392 from Nigeria (Braun et al., 2020). Due to poor analytical recoveries at the outset, fumonisins  
393 were not included in the breast milk analysis. The observed variations in mycotoxin levels in  
394 breast milk from our study compared to previous reports may be due to any or several of these  
395 factors: differences in study population (geography and size), dietary patterns, metabolic status  
396 of mothers, lactation stage, or even the uncertainty related to comparing data from distinct  
397 analytical methods .

398         Mycotoxins have been previously reported in complementary foods (Cappozzo et al.,  
399 2017; Chuisseu Njamen et al., 2018; Juan et al., 2014; Kamala et al., 2016; Kolakowski et al.,  
400 2016; Ojuri et al., 2018, 2019; Oueslati et al., 2018). The detection of more diverse spectra of  
401 mycotoxins (AF, BEA, EnnB, FUM, MON and ZEN) in the traditionally processed  
402 complementary foods (*ogi* and *tombran*) compared to the industrially processed infant cereal  
403 agrees with an earlier report from our group on mycotoxins in complementary foods from



404 Nigeria (Ojuri et al., 2018, 2019). AFs were detected in about 20% of the food samples, but  
405 notably not in the infant cereal. The mean of these samples with detectable AFs in traditionally  
406 processed complementary foods exceeded the 4 µg/kg maximum level for total AF in Nigerian  
407 baby food (Ojuri et al., 2018). The presence of AF in locally processed complementary foods but  
408 not in commercial infant cereal is in keeping with the report from Cameroon (Chuisseu Njamen  
409 et al., 2018). However, the levels found in the present study were lower than those previously  
410 reported in locally processed baby foods from Cameroon (mean: 177 µg/kg, Chuisseu Njamen  
411 et al., 2018) and Nigeria (mean: 104 µg/kg, Ojuri et al., 2018), but similar to Ghana (mean: 8.3  
412 µg/kg, Blankson et al., 2019). Unlike most of the aforementioned reports, herein we analyzed  
413 plate-ready food for a more precise food contamination data because it considers food ingested  
414 after final preparatory steps such as dilution and cooking (Chuisseu Njamen et al., 2018; Ezekiel  
415 et al., 2019). Clearly, the methods employed at household levels, often characterized by poor  
416 food processing practices, influenced the mycotoxin contents in the traditionally processed  
417 complementary foods. The fact that we could not detect AF in the infant cereal could be  
418 attributed to tailoring of production by industrial processors to meet regulatory standards for AF.

419 FUM was detected in all the complementary food types. However, the mean  
420 concentrations we found were lower than the European Union ML of 200 µg/kg for baby food  
421 (EC, 2006) and the mean level (2808 µg/kg) reported in Tanzania (Kamala et al., 2016). FUM is  
422 not regulated in baby foods in Nigeria. Nevertheless, the observed co-occurrence of FUM with  
423 AF in about 20% of the complementary foods is of concern, because these two mycotoxins are  
424 suggested to negatively influence linear growth in children (IARC, 2015; Shirima et al., 2015).  
425 Meanwhile, a potential role of additional toxins in mixtures is unknown.

426 Several mycotoxins were detected in the children's urine similar to previous reports from  
427 Cameroon (Ediage et al., 2013), Nigeria (Ezekiel et al., 2014), Spain (Rodriguez-Carrasco et al.,  
428 2014) and Belgium (Heyndrickx et al., 2015) where the simultaneous exposure to more than two  
429 mycotoxins were detected. The incidences and analytical concentrations of commonly found

430 mycotoxins in children urine were compared with data from previous studies. Overall, ZEN  
431 (incidence: 74%), a potent estrogenic mycotoxin (IARC 2012b, 2015), was the most frequently  
432 detected mycotoxin in the urine samples. Two ZEN metabolites,  $\alpha$ -ZEL and  $\beta$ -ZEL, were  
433 detected in the urine samples albeit at lower frequencies (11% and 20%, respectively)  
434 compared to the parent compound. This is in contrast to the reports of Heyndrickx et al. (2015)  
435 wherein ZEN and its metabolites were not detected in children urine from Belgium. The  
436 incidence of ZEN in the present study was, however, higher than the incidence (4%, 9/220)  
437 previously reported in Cameroonian children employing a method of lower sensitivity, whereas  
438 the mean level was higher in the Cameroonian children (970 ng/L) (Ediage et al., 2013) than in  
439 the present study (142 ng/L). Similarly, the incidence of DHC in the present study (57%, 37/65)  
440 was higher, although with a lower mean concentration of 212 ng/L, than the 14% (20/142)  
441 incidence and mean of 490 ng/L reported in urine of adults and children in Haiti (Gerding et al.,  
442 2015). Additionally, the incidence of DHC in the present study was much higher than the 6%  
443 (7/124) incidence reported for DHC in urine of Belgian children (Heyndrickx et al., 2015). The  
444 parent toxin CIT was not detected in any urine sample, which agrees with the reports from Haiti  
445 but negates the Belgian study that found both parent compound (CIT) and its metabolite (DHC).  
446 Regardless, the higher incidence of DHC recorded in the present study further suggests that  
447 CIT exposure is widespread in Nigerian children. DON (46%, 30/65) occurrence in urine in the  
448 present study was lower than those previously reported in adults from France (99%, 75/76,  
449 Turner et al., 2010), pregnant women (100%, 85/85, Hepworth et al., 2012) and children in the  
450 United Kingdom (100%, 40/40, Papageorgiou et al., 2018; 100%, 21/21, Gratz et al., 2020), but  
451 more similar to in the reports from Egypt (68%, 63/93, Piekkola et al., 2012) and Iran (72%,  
452 79/110, Turner et al., 2012b). Infant data on DON in urine are mostly lacking. In the present  
453 study, urinary OTA (34%, 22/65; mean: 14 ng/L) was lower than the previous report in  
454 Portuguese children (93%, 79/85; mean: 20 ng/L) (Silva et al., 2019). Similarly, urinary FB<sub>1</sub>  
455 incidence of 26% (17/65) recorded in the present study was lower than the 96% incidence

456 reported in a study comprising 147 Tanzanian children's urine (Shirima et al., 2013) but was  
457 higher than the incidence (2%, 1/50) reported in Nepalese children (Mitchell et al., 2016).

458 To date, AFM<sub>1</sub> has been the most reported urinary AF metabolite and biomarker in  
459 children (Ayelign et al., 2017; Chen et al., 2017; Ediage et al., 2013; Ezekiel et al., 2014;  
460 Gerding et al., 2015; Polychronaki et al., 2008; Sanchez and Diaz, 2019; Schwartzbord et al.,  
461 2016). However, in the present study, AFQ<sub>1</sub> was found to be the major aflatoxin metabolite (both  
462 in frequency and concentration), occurring in 44/65 (68%) of the children's urine samples,  
463 whereas AFM<sub>1</sub> was detected in 6/65 (9%) of urine samples, four of which had both AFM<sub>1</sub> and  
464 AFQ<sub>1</sub>. Previous reports on AFQ<sub>1</sub> occurrence in human urine were on adolescents and adults  
465 15–64 years of age in China and The Gambia (Groopman et al., 1992a, 1992b; Mykkanen et al.,  
466 2005; Wang et al., 2001). Consequently, to the best of our knowledge, AFQ<sub>1</sub> is reported for the  
467 first time in the urine of children in any setting. Urinary AFM<sub>1</sub> and AF-N7-guanine are  
468 established biomarkers for aflatoxin exposure; however, these were established in adults  
469 (Groopman et al., 1992a). Given the role of CYP3A4 in AFQ<sub>1</sub> formation (Wild and Turner,  
470 2002) and the known significant ontogeny in xenobiotic metabolizing enzymes (Blake et al.,  
471 2005), involved in AFB<sub>1</sub> biotransformation, it would be useful to better understand the  
472 relationship between dose and the various metabolites of aflatoxins in urine of infants.  
473 Nevertheless, the recorded higher incidence of AFQ<sub>1</sub> in the urine samples compared with AFM<sub>1</sub>  
474 informs us that aflatoxin exposure in young children may be underreported.

475 Comparing the two cohorts of infants, higher mean levels of seven out of the 10 detected  
476 mycotoxins were found in the NEB urine compared to the EB urine, with statistically significant  
477 levels recorded for four of these mycotoxins including AFQ<sub>1</sub>, DON, DHC and FB<sub>1</sub>. Notably,  
478 increases in the mean mycotoxin levels in urine moving from EB regime to the NEB regime  
479 reached 721 and 334% for AFM<sub>1</sub> and FB<sub>1</sub>, respectively. Additionally, the NEB cohort generally  
480 recorded higher diversities of mycotoxin mixtures in urine compared to the EB cohort. Here, we  
481 show that transition from EB to NEB, involving a change in diet, modulates contaminant

482 exposure resulting in a large variation of multiple mycotoxin exposures in infants. This primarily  
483 owes to the higher intake of complementary foods, which are usually made from mycotoxin-  
484 prone cereals, nuts and oil seeds (Chuisseu Njamen et al., 2018; Juan et al., 2014; Kamala et  
485 al., 2016; Kimanya et al., 2009; 2010, 2014; Ojuri et al., 2018, 2019; Okeke et al., 2015). These  
486 observations are strongly suggestive that exclusive breastfeeding provides a relatively, but not  
487 completely, protected period from mycotoxin exposure.

488         The spectra and combinations of mycotoxins detected in the three specimens examined  
489 in this study further suggest frequent exposure in Nigerian children, especially in the NEB  
490 category. Obviously, urine contained higher number of mycotoxins and their mixtures compared  
491 to complementary foods and breast milk. Comparison of the paired contamination frequencies in  
492 both cohorts, especially in the NEB, favored urine with higher frequencies detected for  
493 aflatoxins, FB<sub>1</sub> and ZEN compared to complementary foods. Further, some mycotoxins occurred  
494 only in the biological fluids reiterating the importance of preferring biomonitoring approaches  
495 over food contamination data for exposure assessment in humans (Ali and Degen, 2019; Turner  
496 et al., 2012; Vidal et al., 2018; Warth et al., 2013). A typical example is DHC and OTA that were  
497 detected only in the biological fluids (breast milk for the EB group and urine from both cohorts).  
498 Although CIT/DHC was not detected in the examined complementary foods in the present  
499 study, it was found in 74% of the urines of EB children. We did not sample milk for the NEB  
500 cohort due to reluctance in provision of milk by mothers in this group; nevertheless, it is possible  
501 that the DHC levels in the urines of both cohorts originated from the lactating mothers' milk  
502 since this metabolite or its parent toxin was not found in the complementary food. CIT levels in  
503 grains (especially maize) and complementary food in Nigeria have recently been shown to be  
504 high reaching 16,000 µg/kg (Ezekiel et al., 2020; Ojuri et al., 2018, 2019; Okeke et al., 2015,  
505 2018). Fermented cocoa beans in Nigeria, which could also be processed and used in the  
506 preparation of foods for mothers as well as for infants and young children, have also recently  
507 been reported to contain CIT (Akinfala et al., 2020). Put together, only aflatoxins, DHC and OTA

508 were found in both breast milk and urine of the EB cohort, while aflatoxins, DON, FB<sub>1</sub> and ZEN  
509 were detected in both complementary food and NEB children's urine.

510 An additional important finding was the detection of BEA and EnnB in complementary  
511 food and breast milk but not in urine because the urinary analytical method did not include both  
512 mycotoxins. EnnB was recently detected in adult human urine from Italy (Rodriguez-Carrasco et  
513 al., 2018); however, there is limited data on urinary BEA and EnnB in children. Considering the  
514 widespread detection of BEA and EnnB in foods in Nigeria, albeit at low concentrations (Abdus-  
515 Salaam et al., 2015; Adetunji et al., 2014; Ezekiel et al., 2016; Ojuri et al., 2018; Oyedele et al.,  
516 2017), and the documented *in vitro* data suggesting their roles in decreasing immune response  
517 to infections (Ficheux et al., 2013) as well as their interactions to cause additive myelotoxicity  
518 (Ficheux et al., 2012), the inclusion of both mycotoxins in future urinary biomonitoring studies,  
519 especially for children, is recommended.

520 In this study, the levels of any given mycotoxin were typically modest compared to  
521 studies where associations with an individual mycotoxin and a given health outcome, e.g.,  
522 stunting, was reported (IARC, 2015). However, the study reveals a clear transition in exposure  
523 from EB to NEB infants in terms of both level and frequency to mixtures. The overall health  
524 implication for children in the study region was not measured. Focusing on infant growth, *in vitro*  
525 studies using human intestinal cell lines revealed that DON selectively modulated intestinal  
526 transporters (Maresca et al., 2002) while FB<sub>1</sub> decreased intestinal cell viability and proliferation  
527 (Minervini et al., 2014). Consequently, these mycotoxins may play interactive roles to affect  
528 nutrient absorption (Liew and Mohd-Redzwan, 2018) which may cumulatively contribute to AF  
529 induced growth faltering. Thus, future studies may consider exploring the type and extent of  
530 interactive effects the various recorded mixtures may have on this highly vulnerable population  
531 and their growth into adulthood.

532

## 533 **5. Conclusion**

534 This study provides a comprehensive account on and novel insights into multiple  
535 mycotoxin exposures in EB and NEB infants in a high-risk country, Nigeria, based on  
536 examination of three specimens (breast milk, complementary food and urine). One pitfall of this  
537 study is the non-collection of breast milk for the NEB cohort, leaving the conclusions on NEB  
538 cohort anchored more on the urine data, which served as a comparative matrix for both EB and  
539 NEB cohorts. However, data for breast milk from EB cohort suggested that no significant  
540 exposure to the most carcinogenic mycotoxins was recorded. Consequently, we report the  
541 presence of several uncommon mycotoxins in biological fluids (DHC and STER in breast milk;  
542 and AFQ<sub>1</sub>, being the dominant urinary aflatoxin metabolite). The higher incidence of AFQ<sub>1</sub> in  
543 infant urine compared with AFM<sub>1</sub> suggests that aflatoxin exposure in young children may be  
544 underreported. Second, the presence of up to six distinct mycotoxin classes are reported for the  
545 first time in breast milk and infant urine. Third, urines of NEB infants contained higher levels of  
546 mycotoxins and several mixtures of these toxins more frequently than in urines of EB infants.  
547 Thus, exposure to mycotoxins for infants less than 18 months of age is common in the region,  
548 with a significant transition in higher frequency and levels of exposure with the introduction of  
549 complementary foods. Consequently, it is recommended that mothers adhere strictly to  
550 measures with potential to reduce mycotoxin contamination in household diets; including  
551 maintaining compliance to WHO recommendations for exclusive breastfeeding for 6 months.  
552 Once foods are being introduced, adequate drying and proper storage of grains in airtight  
553 containers at household levels, sorting out of moldy, damaged and discolored grains prior to  
554 meal preparation, and diet diversification to include less mycotoxin prone food crops such as  
555 tubers are advised. In addition, prioritizing partnerships focused on driving interventions to  
556 mitigate exposures in vulnerable populations is important. Furthermore, attempts to investigate  
557 mycotoxin exposure and toxicity holistically in the context of the exposome and DOHaD  
558 paradigm should be encouraged.

559

560 **Conflict of interest**

561 Authors do not have any conflict to declare.

562

563 **Acknowledgements**

564 Authors are thankful to Chidinma Akwarandu and Linda Ogu for their assistance during sample  
565 collection, and Xiaomin Han, during urine sample preparation. Families who donated samples  
566 are deeply appreciated. The authors want to gratefully acknowledge the Mass Spectrometry  
567 Centre (MSC) of the Faculty of Chemistry at the University of Vienna and Sciex for providing  
568 mass spectrometric instrumentation to BW. This work was performed with the financial support  
569 of the University of Vienna, the City of Vienna Jubilee Funds (BOKU Research Funding, project  
570 MycoMarker) and the Austrian Science Fund (FWF): P 33188-B.

571

572 **References**

573 Abdus-Salaam, R.S., Fanelli, F., Atanda, O., Sulyok, M., Cozzi, G., Bavaro, S., et al., 2015.  
574 Fungal and bacterial metabolites associated with natural contamination of locally  
575 processed rice (*Oryza sativa* L.) in Nigeria. *Food Addit. Contam. Part A*. 32(6), 950–959.  
576 <https://doi.org/10.1080/19440049.2015.1027880>.

577 Adejumo, O., Atanda, O., Raiola, A., Somorin, Y., Bandyopadhyay, R., Ritieni, A., 2013.  
578 Correlation between aflatoxin M<sub>1</sub> content of breast milk, dietary exposure to aflatoxin B<sub>1</sub>  
579 and socioeconomic status of lactating mothers in Ogun state, Nigeria. *Food Chem.*  
580 *Toxicol.* 56, 171–177. <https://doi.org/10.1016/j.fct.2013.02.027>.

581 Adetunji, M., Atanda, O., Ezekiel, C., Sulyok, M., Warth, B., Beltran, E., et al., 2014. Fungal and  
582 bacterial metabolites of stored maize (*Zea mays*, L.) from five agro-ecological zones of  
583 Nigeria. *Mycotoxin Res.* 30, 89–102. <https://doi.org/10.1007/s12550-014-0194-2>.

584 Aichinger, G., Kruger, F., Puntischer, H., Preindl, K., Warth, B., Marko, D., 2019. Naturally  
585 occurring mixtures of *Alternaria* toxins: anti-estrogenic and genotoxic effects *in vitro*.  
586 *Arch. Toxicol.* 93(10), 3021–3031. <https://doi.org/10.1007/s00204-019-02545-z>.

- 587 Akinfala, T.O., Houbraken, J., Sulyok, M., Adediji, A.R., Odebode, A.C., Krska, R., et al., 2020.  
588 Moulds and their secondary metabolites associated with the fermentation and storage of  
589 two cocoa bean hybrids in Nigeria. *Int. J. Food Microbiol.* 316, 108490. <https://doi.org/10.1016/j.ijfoodmicro.2019.108490>  
590
- 591 Ali, N., Degen, G.H., 2019. Citrinin biomarkers: a review of recent data and application to  
592 human exposure assessment. *Arch. Toxicol.* 93(11), 3057–3066.  
593 <https://doi.org/10.1007/s00204-019-02570-y>.
- 594 Alvito, P.C., Sizoo, E.A., Almeida, C.M.M., Egmond, H.P.V., 2010. Occurrence of aflatoxins and  
595 ochratoxin A in baby foods in Portugal. *Food Anal. Methods*, 3, 22–30.  
596 <https://doi.org/10.1007/s12161-008-9064-x>.
- 597 Ayelign, A., Woldegiorgis, A.Z., Adish, A., De Boevre, M., Heyndrickx, E., De Saeger, S.,  
598 2017. Assessment of aflatoxin exposure among young children in Ethiopia using urinary  
599 biomarkers. *Food Addit. Contam. Part A.* 34(9), 1606–1616.  
600 <https://doi.org/10.1080/19440049.2017.1350290>.
- 601 Barker, D.P.J., 2000. Fetal programming: influences on development and disease in later life, in:  
602 Dekker M. (Eds.), *NIH Monograph Series*. New York.
- 603 Bateson, P., Barker, D., Clutton-Brock, T., Deb, D., D'Udine, B., Foley, R.A., et al., 2004.  
604 Developmental plasticity and human health. *Nature.* 430, 419–421.  
605 <https://doi.org/10.1038/nature02725>.
- 606 Blake, M.J., Castro, L., Leeder, J.S., Kerans, G.L., 2005. Ontogeny of drug metabolizing  
607 enzymes in the neonate. *Semin. Fetal Neonatal Med.* 10(2), 123–138.  
608 <https://doi.org/10.1016/j.siny.2004.11.001>.
- 609 Blankson, G.K., Mills-Robertson, F.C., Ofofu, I.W., 2019. Survey of occurrence levels of  
610 aflatoxins in selected locally processed cereal-based foods for human consumption from  
611 Ghana. *Food Contr.* 95, 170–175. <https://doi.org/10.1016/j.foodcont.2018.08.005>.
- 612 Braun, D., Ezekiel, C.N., Abia, W.A., Wisgrill, L., Degen, G.H., Turner, P.C., et al., 2018.  
613 Monitoring early-life mycotoxin exposures via LC-MS/MS breast milk analysis. *Anal.*  
614 *Chem.* 90, 14569–14577. <https://doi.org/10.1021/acs.analchem.8b04576>.



- 615 Braun, D., Ezekiel, C.N., Marko, D., Warth, B., 2020. Exposure to mycotoxin-mixtures via breast  
616 milk: an ultra-sensitive LC-MS/MS biomonitoring approach. *Front. Chem.* 8, 423.  
617 <https://doi.org/10.3389/fchem.2020.00423>.
- 618 Butts, C.A., Hedderley, D.I., Herath, T.D., Paturi, G., Glyn-Jones, S., Wiens, F., et al., 2018.  
619 Human milk composition and dietary intakes of breastfeeding women of different  
620 ethnicity from the Manawatu Wanganui region of New Zealand. *Nutrients.* 10, 1231.  
621 <https://doi.org/10.3390/nu10091231>.
- 622 Cappozzo, J., Jackson, L., Lee, H.J., Zhou, W., Al-Taher, F., Zweigenbaum, J., et al.,  
623 2017. Occurrence of ochratoxin A in infant foods in the United States. *J. Food Prot.*  
624 80(2), 251–256. <https://doi.org/10.4315/0362-028X.JFP-16-339>.
- 625 Chen, G., Gong, Y.Y., Kimanya, M.E., Shirima, C.P., Routledge, M.N., 2017. Comparison of  
626 urinary aflatoxin M<sub>1</sub> and aflatoxin albumin adducts as biomarkers for assessing aflatoxin  
627 exposure in Tanzanian children. *Biomarkers.* 23(2), 131–136.  
628 <https://doi.org/10.1080/1354750X.2017.1285960>.
- 629 Cherkani-Hassani, A., Mojemmi, B., Mouane, N., 2016. Occurrence and levels of mycotoxins  
630 and their metabolites in human breast milk associated to dietary habits and other factors:  
631 A systematic literature review, 1984–2015. *Trends Food Sci. Technol.* 50, 56–69.  
632 <https://doi.org/10.1016/j.tifs.2016.01.024>.
- 633 Chuisseu Djamien, D.P., Abia, W.A., Zibi, S.B., Kuo, N.S., Ngantchouko Ngalemo, C.B., Tambo,  
634 E., et al., 2018. Safety of breast milk vis-à-vis common infant formula and  
635 complementary foods from mycotoxin perspective. *Recent Adv. Food Sci.* 1(1), 23–31.
- 636 Chu, F.S., Li, G.Y., 1994. Simultaneous occurrence of fumonisin B<sub>1</sub> and other mycotoxins in  
637 moldy corn collected from the People's Republic of China in regions with high incidences  
638 of esophageal cancer. *Appl. Environ. Microbiol.* 60, 847–852.
- 639 EC (European Commission), 2002. Commission Decision 2002/657 of 12 August 2002  
640 implementing Council Directive 96/23/EC concerning the performance of analytical  
641 methods and the interpretation of results. *Off. J. Euro. Union L.* 221, 8–36.
- 642 EC (European Commission), 2006. Commission regulation (EC) No 1881/2006 of 19 December  
643 2006 setting maximum levels for certain contaminants in foodstuffs. *Off. J. Euro. Union,*  
644 364, 5–24. Available at <https://eur-lex.europa.eu/>. Accessed 01/ 02/2020.

- 645 EC (European Commission), 2014. Commission regulation (EU) No 212/2014 of 6 March 2014  
646 amending Regulation (EC) No 1881/2006 as regards maximum levels of the  
647 contaminant citrinin in food supplements based on rice fermented with red yeast  
648 *Monascus purpureus*. Available at <http://faolex.fao.org/docs/pdf/eur131703.pdf>.  
649 Accessed on 01/02/2020.
- 650 Ediage, E.N., Diana Di Mavungu, J., Song, S., Sioen, I., De Saeger, S., 2013. Multimycotoxin  
651 analysis in urines to assess infant exposure: a case study in Cameroon. *Environ. Int.*  
652 57–58, 50–59. <https://doi.org/10.1016/j.envint.2013.04.002>.
- 653 EFSA (European Food Safety Authority), 2012. Scientific opinion on the risks for public and  
654 animal health related to the presence of citrinin in food and feed. *EFSA J.* 10, 2605.  
655 <https://doi.org/10.2903/j.efsa.2012.2605>.
- 656 EFSA (European Food Safety Authority). 2013. Scientific opinion on the risk for public and  
657 animal health related to the presence of sterigmatocystin in food and feed. *EFSA J.*  
658 11(6), 3254. <https://doi.org/10.2903/j.efsa.2013.3254>.
- 659 Ezekiel, C.N., Ayeni, K.I., Misihairabgwi, J.M., Somorin, Y.M., Chibuzor-Onyema, I.E., Oyedele,  
660 O.A., et al., 2018a. Traditionally processed beverages in Africa: A review of the  
661 mycotoxin occurrence patterns and exposure assessment. *Compr. Rev. Food Sci. Food*  
662 *Saf.* 17(2), 334–351, <https://doi.org/10.1111/1541-4337.12329>.
- 663 Ezekiel, C.N., Oyedele, O.A., Kraak, B., Ayeni, K.I., Sulyok, M., Houbraken, J., et al., 2020.  
664 Fungal diversity and mycotoxins in low moisture content ready-to-eat foods in Nigeria.  
665 *Front. Microbiol.* 11, 615. <https://doi.org/10.3389/fmicb.2020.00615>.
- 666 Ezekiel, C.N., Oyeyemi, O.T., Oyedele, O.A., Ayeni, K.I., Oyeyemi, I.T., Nabofa, W., et al.,  
667 2018b. Urinary aflatoxin exposure monitoring in rural and semi-urban populations in  
668 Ogun state, Nigeria. *Food Addit. Contam. Part A.* 35(8), 1565–1572.  
669 <https://doi.org/10.1080/19440049.2018.1475752>.
- 670 Ezekiel, C.N., Sulyok, M., Ogara, I.M., Abia, W.A., Warth, B., Šarkanj, B., et al.,  
671 2019. Mycotoxins in uncooked and plate-ready household food from rural northern  
672 Nigeria. *Food Chem. Toxicol.* 128, 171–179. <https://doi.org/10.1016/j.fct.2019.04.002>.
- 673 Ezekiel, C.N., Sulyok, M., Somorin, Y., Odutayo, F.I., Nwabekee, S.U., Balogun, A.F., et al.,  
674 2016. Mould and mycotoxin exposure assessment of melon and bush mango seeds, two

- 675 common soup thickeners consumed in Nigeria. *Int. J. Food Microbiol.* 237, 83–91.  
676 <https://doi.org/10.1016/j.ijfoodmicro.2016.08.019>.
- 677 Ezekiel, C.N., Warth, B., Ogara, I.M., Abia, W.A., Ezekiel, V.C., Atehnkeng, J., et al.,  
678 2014. Mycotoxin exposure in rural residents in northern Nigeria: A pilot study using multi-  
679 urinary biomarkers. *Environ. Int.* 66, 138–145.  
680 <https://doi.org/10.1016/j.envint.2014.02.003>.
- 681 Ferrufino-Guardia, E., Chavez-Rico, V., Larondelle, Y., 2019. Ochratoxin A in human breast  
682 milk, maternal and placental blood from Cochabamba-Bolivia. *Rev. Toxicol.* 36, 116–  
683 125.
- 684 Ficheux, A.S., Sibiril, Y., Parent-Massin, D., 2012. Co-exposure of *Fusarium* mycotoxins: *in vitro*  
685 myelotoxicity assessment on human hematopoietic progenitors. *Toxicol.* 60(6), 1171–  
686 1179. <https://doi.org/10.1016/j.toxicol.2012.08.001>.
- 687 Ficheux, A.S., Sibiril, Y., Parent-Massin, D., 2013. Effects of beauvericin, enniatin B and  
688 moniliformin on human dendritic cells and macrophages: An *invitro* study. *Toxicol.* 71,  
689 1–10. <https://doi.org/10.1016/j.toxicol.2013.04.024>.
- 690 Gerding, J., Ali, N., Schwartzbord, J., Cramer, B., Brown, D.L., Degen, G.H., Humpf, H.-U.,  
691 2015. A comparative study of the human urinary mycotoxin excretion patterns in  
692 Bangladesh, Germany, and Haiti using a rapid sensitive LC-MS/MS approach.  
693 *Mycotoxin Res.* 31(3), 127–136. <https://doi.org/10.1007/s12550-015-0223-9>.
- 694 Gong, Y.Y., Cardwell, K., Hounsa, A., Egal, S., Turner, P.C., Hall, A.J., et al., 2002. Dietary  
695 aflatoxin exposure and impaired growth in young children from Benin and Togo: cross  
696 sectional study. *Br. Med. J.* 325, 20–21. <https://doi.org/10.1136/bmj.325.7354.20>.
- 697 Gong, Y.Y., Egal, S., Hounsa, A., Turner, P.C., Hall, A.J., Cardwell, K., et al., 2003.  
698 Determinants of aflatoxin exposure in young children from Benin and Togo, West Africa:  
699 the critical role of weaning. *Int. J. Epidemiol.* 32, 556–562.  
700 <https://doi.org/10.1093/ije/dyg109>.
- 701 Gong, Y., Hounsa, A., Egal, S., Turner, P.C., Sutcliffe, A.E., Hall, A.J., et al., 2004. Postweaning  
702 exposure to aflatoxin results in impaired child growth: a longitudinal study in Benin, West  
703 Africa. *Environ. Health Perspect.* 112, 1334–1338. <https://doi.org/10.1289/ehp.6954>.

- 704 Gong, Y.Y., Wilson, S., Mwatha, J.K., Routledge, M.N., Castelino, J.M., Zhao, B., et al., 2012.  
705 Aflatoxin exposure may contribute to chronic hepatomegaly in Kenyan school children.  
706 *Environ. Health Perspect.* 120, 893–896. <https://doi.org/10.1289/ehp.1104357>.
- 707 Gratz, S.W., Currie, V., Duncan, G., Jackson, D., 2020. Multimycotoxin exposure assessment in  
708 UK children using urinary biomarkers – a pilot survey. *J Agric. Food Chem.* 68(1), 351–  
709 357. <https://doi.org/10.1021/acs.jafc.9b03964>
- 710 Groopman, J.D., Hall, A.J., Whittle, H., Hudson, G.J., Wogan, G.N., Montesano, R., et al.,  
711 1992a. Molecular dosimetry of aflatoxin-N7-guanine in human urine obtained in the  
712 Gambia, west Africa. *Cancer Epidemiol. Biomarkers Prev.* 1, 221–227.
- 713 Groopman, J.D., Jiaqi, Z., Donahue, P.R., Pikul, A., Lisheng, Z., Jun-shi, C., et al., 1992b.  
714 Molecular dosimetry of urinary aflatoxin-DNA adducts in People living in Guangxi  
715 autonomous region, People’s Republic of China. *Cancer Res.* 52, 45–52.
- 716 Hepworth, S.J., Hardie, L.J., Fraser, L.K., Burley, V.J., Mijal, R.S., Wild, C.P., et al., 2012.  
717 Deoxynivalenol exposure assessment in a cohort of pregnant women from Bradford, UK.  
718 *Food Addit. Contam. Part A: Chem. Anal. Control Expo. Risk Assess.* 29(2), 269–276.  
719 <https://doi.org/1080/19440049.2010.551301>.
- 720 Heussner, A.H., Bingle, L.E.H., 2015. Comparative ochratoxin toxicity: a review of the available  
721 data. *Toxins.* 7(10), 4253–4282. <https://doi.org/10.3390/toxins7104253>.
- 722 Heyndrickx, E., Sioen, I., Huybrechts, B., Callebaut, A., De Henauw, S., De Saeger, S.,  
723 2015. Human biomonitoring of multiple mycotoxins in the Belgian population: results of  
724 the BIOMYCO study. *Environ. Int.* 84, 82–89.  
725 <https://doi.org/10.1016/j.envint.2015.06.011>.
- 726 IARC (International Agency for Research on Cancer), 1987. Some naturally occurring  
727 substances. In: IARC monographs on the evaluation of carcinogenic risks to humans.  
728 Summaries and evaluations. 10, 72.
- 729 IARC (International Agency for Research on Cancer), 2002. Traditional herbal medicines, some  
730 mycotoxins, naphthalene, and styrene. IARC monographs on the evaluation carcinogenic  
731 risk to humans. 82, 1–556.

- 732 IARC (International Agency for Research on Cancer), 2012a. Monographs on the evaluation of  
733 carcinogenic risks to humans: chemical agents and related occupations. A review of  
734 human carcinogens. Lyon, France: 100F, 224–248.
- 735 IARC (International Agency for Research on Cancer), 2012b. Improving public health through  
736 mycotoxin control, IARC Scientific publication No. 158, Lyon.
- 737 IARC (International Agency for Research on Cancer). 2015. Mycotoxin control in low- and  
738 middle-income countries, IARC Working Group Reports 9, Lyon.
- 739 Iha, M.H., Barbosa, C.B., Heck, A.R., Trucksess, M.W., 2014. Aflatoxin M<sub>1</sub> and ochratoxin A in  
740 human milk in Ribeirão Preto-SP, Brazil. *Food Contr.* 40, 310–313.  
741 <https://doi.org/10.1016/j.foodcont.2013.12.014>.
- 742 Innis, S.M., 2014. Impact of maternal diet on human milk composition and neurological  
743 development of infants. *Am. J. Clin. Nutr.* 99(3), 734S-741S.  
744 <https://doi.org/10.3945/ajcn.113.072595>.
- 745 Jonsyn, F.E., Maxwell, S.M., Hendrickse, R.G., 1995. Ochratoxin A and aflatoxins in breast milk  
746 samples from Sierra Leone. *Mycopathologia.* 131, 121–126.  
747 <https://doi.org/10.1007/BF01102890>.
- 748 Juan, C., Raiola, A., Mães, J., Ritieni, A., 2014. Presence of mycotoxin in commercial infant  
749 formulas and baby foods from Italian market. *Food Contr.* 39, 227–236.  
750 <https://doi.org/10.1016/j.foodcont.2013.10.036>.
- 751 Kamala, A., Kimanya, M., Lachat, C., Jacxsens, L., Haesaert, G., Kolsteren, P., et al., 2016.  
752 Risk of exposure to multiple mycotoxins from maize-based complementary foods in  
753 Tanzania. *J. Agr. Food Chem.* 65(33), 7106–7114.  
754 <https://doi.org/10.1021/acs.jafc.6b03429>.
- 755 Kimanya, M.E., Meulenaer, B.D., Baert, K., Tiisekwa, B., Camp, J.V., Samapundo, S., et al.,  
756 2009. Exposure of infants to fumonisins in maize-based complementary foods in rural  
757 Tanzania. *Mol. Nutr. Food Res.* 53, 667–674. <https://doi.org/10.1002/mnfr.200700488>.
- 758 Kimanya, M.E., Meulenaer, B.D., Baert, K., Tiisekwa, B., Camp, J.V., Samapundo, S., et al.,  
759 2010. Fumonisin exposure through maize in complementary foods is inversely

- 760 associated with linear growth of infants in Tanzania. *Mol. Nutr. Food Res.* 54, 1659–  
761 1667. <https://doi.org/10.1002/mnfr.200900483>.
- 762 Kimanya, M.E., Shirima, C.P., Magoha, H., Shewiyo, D.H., De Meulenaer, B., Kolsteren, P., et  
763 al., 2014. Co-exposures of aflatoxins with deoxynivalenol and fumonisins from maize-  
764 based complementary foods in Rombo, northern Tanzania. *Food Contr.* 41, 76–81.  
765 <https://doi.org/10.1016/j.foodcont.2013.12.034>.
- 766 Kolakowski, B., O'rourke, S.M., Bietlot, H.P., Kurz, K., Aweryn, B., 2016. Ochratoxin A  
767 concentrations in a variety of grain-based and non-grain-based foods on the Canadian  
768 retail market from 2009 to 2014. *J. Food Prot.* 79(12), 2143–2159.  
769 <https://doi.org/10.4315/0362-028X.JFP-16-051>.
- 770 Liew, W.P.P., Mohd-Redzwan, S., 2018. Mycotoxin: Its Impact on gut health and microbiota.  
771 *Front. Cell Infect. Microbiol.* 8, 60. <https://doi.org/10.3389/fcimb.2018.00060>.
- 772 Magnusson, B., 2014. "The fitness for purpose of analytical methods: A laboratory guide to  
773 method validation and related topics." 2nd. Eurachem,  
774 [https://www.eurachem.org/images/stories/Guides/pdf/MV\\_guide\\_2nd\\_ed\\_EN.pdf](https://www.eurachem.org/images/stories/Guides/pdf/MV_guide_2nd_ed_EN.pdf).
- 775 Mandy, M., Nyirenda, M., 2018. Developmental origins of health and disease: The relevance to  
776 developing nations. *Int. Health* 10, 66–70. <https://doi.org/10.1093/inthealth/ihy006>.
- 777 Maresca, M., Mahfoud, R., Garmy, N., Fantini, J., 2002. The mycotoxin deoxynivalenol affects  
778 nutrient absorption in human intestinal epithelial cells. *J. Nutr.* 132(9), 2723–2731.  
779 <https://doi.org/10.1093/jn/132.9.2723>.
- 780 McMillian, A., Renaud, J.B., Burgess, K.M.N., Orimadegun, A.E., Akinyinka, O.O., Allen, S.J., et  
781 al., 2018. Aflatoxin exposure in Nigerian children with severe acute malnutrition. *Food*  
782 *Chem. Toxicol.* 111, 356–362. <https://doi.org/10.1016/j.fct.2017.11.030>.
- 783 Minervini, F., Garbetta, A., D'Antuono, I., Cardinali, A., Martino, N.A., Debellis, L., et al.,  
784 2014. Toxic mechanisms induced by fumonisin B<sub>1</sub> mycotoxin on human intestinal cell  
785 line. *Arch. Environ. Con. Tox.* 67(1), 115–123. [https://doi.org/10.1007/s00244-014-0004-  
z](https://doi.org/10.1007/s00244-014-0004-<br/>786 z).
- 787 Missmer, S.A., Suarez, L., Felkner, M., Wang, E., Merrill Jr, A.H., Rothman, K.J., et al., 2006.  
788 Exposure to fumonisins and the occurrence of neural tube defects along the Texas–

- 789 Mexico border. Environ. Health Perspect. 114, 237–241.  
790 <https://doi.org/10.1289/ehp.8221>.
- 791 Mitchell, N.J., Riley, R.T., Egner, P.A., Groopman, J.D., Wu, F., 2016. Chronic aflatoxin  
792 exposure in children living in Bhaktapur, Nepal: extension of the MAL-ED study. J. Exp.  
793 Sci. Env. Epid. 27(1), 106–111. <https://doi.org/10.1038/jes.2015.87>.
- 794 Muñoz, K., Blaszkewicz, M., Campos, V., Vega, M., Degen, G.H., 2014. Exposure of infants to  
795 ochratoxin A with breast milk. Arch. Toxicol. 88(3), 837–846.  
796 <https://doi.org/10.1007/s00204-013-1168-4>.
- 797 Mykkänen, H., Zhu, H., Salminen, E., Juvonen, R.O., Ling, W., Ma, J., et al., 2005. Fecal and  
798 urinary excretion of aflatoxin B<sub>1</sub> metabolites (AFQ<sub>1</sub>, AFM<sub>1</sub> and AFB-N7-guanine) in  
799 young Chinese males. Int. J. Cancer. 115(6), 879–884. <https://doi.org/10.1002/ijc.20951>.
- 800 Ojuri, O.T., Ezekiel, C.N., Eskola, M.K., Šarkanj, B., Babalola, A.D., Sulyok, M., et al., 2019.  
801 Mycotoxin co-exposures in infants and young children consuming household and  
802 industrially-processed complementary foods in Nigeria and risk management advice.  
803 Food Contr. 98, 312–322. <https://doi.org/10.1016/j.foodcont.2018.11.049>.
- 804 Ojuri, O.T., Ezekiel, C.N., Sulyok, M., Ezeokoli, O.T., Oyedele, O.A., Ayeni, K.I., et al., 2018.  
805 Assessing the mycotoxicological risk from consumption of complementary foods by  
806 infants and young children in Nigeria. Food Chem. Toxicol. 121, 37–50.  
807 <https://doi.org/10.1016/j.fct.2018.08.025>.
- 808 Okeke, C.A., Ezekiel, C.N., Nwangburuka, C.C., Sulyok, M., Ezeamagu, C.O., Adeleke, R.A., et  
809 al., 2015. Bacterial diversity and mycotoxin reduction during maize fermentation  
810 (steeping) for *ogi* production. Front. Microbiol. 6, 1402.  
811 <https://doi.org/10.3389/fmicb.2015.01402>.
- 812 Okeke, C.A., Ezekiel, C.N., Sulyok, M., Ogunremi, O.R., Ezeamagu, C.O., Šarkanj, B., et al.,  
813 2018. Traditional processing impacts mycotoxin levels and nutritional value of *ogi* – A  
814 maize-based complementary food. Food Contr. 86, 224–233.  
815 <https://doi.org/10.1016/j.foodcont.2017.11.021>.
- 816 Oplatowska-Stachowiak, M., Reiring, C., Sajic, N., Haasnoot, W., Brabet, C., Campbell, K., et  
817 al., 2018. Development and in-house validation of a rapid and simple to use ELISA for

- 818 the detection and measurement of the mycotoxin sterigmatocystin. *Anal. Bioanal. Chem.*  
819 410(12), 3017–3023. <https://doi.org/10.1007/s00216-018-0988-8>.
- 820 Ortiz, J., Jacxsens, L., Astudillo, G., Ballesteros, A., Donoso, S., Huybregts, L., et al., 2018.  
821 Multiple mycotoxin exposure of infants and young children via breastfeeding and  
822 complementary/weaning foods consumption in Ecuadorian highlands. *Food Chem.*  
823 *Toxicol.* 118, 541–548. <https://doi.org/10.1016/j.fct.2018.06.008>.
- 824 Oueslati, S., Berrada, H., Mañes, J., Juan, C., 2018. Presence of mycotoxins in Tunisian infant  
825 foods samples and subsequent risk assessment. *Food Contr.* 84, 362–369.  
826 <https://doi.org/10.1016/j.foodcont.2017.08.021>.
- 827 Oyedele, O.A., Ezekiel, C.N., Sulyok, M., Adetunji, M.C., Warth, B., Atanda, O.O., et al., 2017.  
828 Mycotoxin risk assessment for consumers of groundnut in domestic markets in Nigeria.  
829 *Int. J. Food Microbiol.* 251, 24–32. <https://doi.org/10.1016/j.ijfoodmicro.2017.03.020>.
- 830 Papageorgiou, M., Wells, L., Williams, C., White, K., De Santis, B., Liu, Y., et al.,  
831 2018. Assessment of urinary deoxynivalenol biomarkers in UK children and adolescents.  
832 *Toxins.* 10(2), 50. <https://doi.org/10.3390/toxins10020050>.
- 833 Pestka, J.J., 2010. Deoxynivalenol: Mechanisms of action, human exposure, and toxicological  
834 relevance. *Arch. Toxicol.* 84, 663–679. <https://doi.org/10.1007/s00204-010-0579-8>.
- 835 Piekkola, S., Turner, P.C., Abdel-Hamid, M., Ezzat, S., El-Daly, M., El-Kafrawy, S., et al., 2012.  
836 Characterisation of aflatoxin and deoxynivalenol exposure among pregnant Egyptian  
837 women. *Food Addit. Contam. Part A: Chem. Anal. Control Expo. Risk Assess.* 29(6),  
838 962–971. <https://doi.org/10.1080/19440049.2012.658442>.
- 839 Polychronaki, N., West, R.M., Turner, P.C., Amra, H., Abdel-Wahhab, M., Mykkänen, H., El-  
840 Nezami, H., 2007. A longitudinal assessment of aflatoxin M<sub>1</sub> excretion in breast milk of  
841 selected Egyptian mothers. *Food Chem. Toxicol.* 45(7), 1210–1215.  
842 <https://doi.org/10.1016/j.fct.2007.01.001>.
- 843 Polychronaki, N., Wild, C.P., Mykkänen, H., Amra, H., Abdel-Wahhab, M., Sylla, A., et al., 2008.  
844 Urinary biomarkers of aflatoxin exposure in young children from Egypt and Guinea. *Food*  
845 *Chem. Toxicol.* 46(2), 519–526. <https://doi.org/10.1016/j.fct.2007.08.034>.



- 846 Preindl, K., Braun, D., Aichinger, G., Sieri, S., Fang, M., Marko, D., et al., 2019. A generic LC-  
847 MS/MS exposome method for the determination of xenoestrogens in biological matrices.  
848 *Anal. Chem.* 91(17), 11334–11342. <https://doi.org/10.1021/acs.analchem.9b02446>.
- 849 Rodriguez-Carrasco, Y., Izzo, L., Gaspari, A., Graziani, G., Mañes, J., Ritieni, A., 2018. Urinary  
850 levels of enniatin B and its phase I metabolites: first human pilot biomonitoring study.  
851 *Food Chem. Toxicol.* 118, 454–459. <https://doi.org/10.1016/j.fct.2018.05.052>.
- 852 Rodriguez-Carrasco, Y., Molto, J.C., Manes, J., Berrada, H., 2014. Exposure assessment  
853 approach through mycotoxin/creatinine ration evaluation in urine by GC-MS/MS. *Food*  
854 *Chem. Toxicol.* 72, 69–75. <https://doi.org/10.1016/j.fct.2014.07.014>.
- 855 Rubert, J., León, N., Sáez, C., Martins, C.P.B., Godula, M., Yusà, V., et al., 2014. Evaluation of  
856 mycotoxins and their metabolites in human breast milk using liquid chromatography  
857 coupled to high resolution mass spectrometry. *Anal. Chim. Acta.* 820, 39–46.  
858 <https://doi.org/10.1016/j.aca.2014.02.009>.
- 859 Sanchez, E.M., Diaz, G.J., 2019. Frequency and levels of aflatoxin M<sub>1</sub> in urine of children in  
860 Bogota, Colombia. *Mycotoxin Res.* 35(3), 271–278. [https://doi.org/10.1007/s12550-019-](https://doi.org/10.1007/s12550-019-00355-x)  
861 [00355-x](https://doi.org/10.1007/s12550-019-00355-x).
- 862 SANTE, 2018. Sante/11813/2017 Analytical Quality Control and Method Validation Procedures  
863 for Pesticide Residues Analysis.  
864 [https://ec.europa.eu/food/sites/food/files/plant/docs/pesticides\\_mrl\\_guidelines\\_wrkdoc\\_2](https://ec.europa.eu/food/sites/food/files/plant/docs/pesticides_mrl_guidelines_wrkdoc_2)  
865 [017-11813.pdf](https://ec.europa.eu/food/sites/food/files/plant/docs/pesticides_mrl_guidelines_wrkdoc_2). Accessed on 8 October 2019.
- 866 Sarkanj, B., Ezekiel, C.N., Turner, P.C., Abia, W.A., Rychlik, M., Krska, R., et al., 2018. Ultra-  
867 sensitive, stable isotope assisted quantification of multiple urinary mycotoxin exposure  
868 biomarkers. *Anal. Chim. Acta.* 1019, 84–92. <https://doi.org/10.1016/j.aca.2018.02.036>.
- 869 Schwartzbord, J.R., Leroy, J.L., Severe, L., Brown, D.L., 2016. Urinary aflatoxin M<sub>1</sub> in Port-au-  
870 Prince and a rural community in north-east Haiti. *Food Addit. Contam. Part A.* 33(6),  
871 1036–1042 <https://doi.org/10.1080/19440049.2016.1185899>.
- 872 Shirima, C.P., Kimanya, M.E., Kinabo, J.L., Routledge, M.N., Srey, C., Wild, C.P., et al., 2013.  
873 Dietary exposure to aflatoxin and fumonisin among Tanzanian children as determined  
874 using biomarkers of exposure. *Mol. Nutr. Food Res.* 57, 1874–1881.  
875 <https://doi.org/10.1002/mnfr.201300116>.

- 876 Shirima, C.P., Kimanya, M.E., Routledge, M.N., Srey, C., Kinabo, J.L., Humpf, H.-U., et al.,  
877 2015. A prospective study of growth and biomarkers of exposure to aflatoxin and  
878 fumonisin during early childhood in Tanzania. *Environ. Health Perspect.* 123(2), 173–  
879 178. <https://doi.org/10.1289/ehp.1408097>.
- 880 Silva, L.J.G., Macedo, L., Pereira, A.M.P.T., Duarte, S., Lino, C.M., Pena, A., 2019. Ochratoxin  
881 A and Portuguese children: urine biomonitoring, intake estimation and risk assessment.  
882 *Food Chem. Toxicol.* 135, 110883. <https://doi.org/10.1016/j.fct.2019.110883>.
- 883 Stadler, D., Sulyok, M., Schuhmacher, R., Berthiller, F., Krska, R., 2018. The contribution of lot-  
884 to-lot variation to the measurement uncertainty of an LC-MS-based multi-mycotoxin  
885 assay. *Anal. Bioanal. Chem.* 410, 4409–4418. [https://doi.org/10.1007/s00216-018-1096-](https://doi.org/10.1007/s00216-018-1096-5)  
886 5.
- 887 Sulyok, M., Stadler, D., Steiner, D., Krska, R., 2020. Validation of an LC-MS/MS-based dilute-  
888 and-shoot approach for the quantification of >500 mycotoxins and other secondary  
889 metabolites in food crops: challenges and solutions. *Anal. Bioanal. Chem.* 412(11),  
890 2607–2620. <https://doi.org/10.1007/s00216-020-02489-9>.
- 891 Sun, G., Wang, S., Hu, X., Su, J., Huang, T., Yu, J., et al., 2007. Fumonisin B<sub>1</sub> contamination of  
892 home-grown corn in high-risk areas for esophageal and liver cancer in China. *Food*  
893 *Addit. Contam.* 24, 181–185. <https://doi.org/10.1080/02652030601013471>.
- 894 Sun, G., Wang, S., Hu, X., Su, J., Zhang, Y., Xie, Y., et al., 2011. Co-contamination of aflatoxin  
895 B<sub>1</sub> and fumonisin B<sub>1</sub> in food and human dietary exposure in three areas of China. *Food*  
896 *Addit. Contam. Part A.* 28, 461–470. <https://doi.org/10.1080/19440049.2010.544678>.
- 897 Turconi, G., Guarcello, M., Livieri, C., Comizzoli, S., Maccarini, L., Castellazzi, A.M., et al.,  
898 2004. Evaluation of xenobiotics in human milk and ingestion by the newborn. *Eur. J.*  
899 *Nutr.* 43(4), 191–197. <https://doi.org/10.1007/s00394-004-0458-2>.
- 900 Turner, P.C., Collinson, A.C., Cheung, Y.B., Gong, Y.Y., Hall, A.J., Prentice, A.M., et al., 2007.  
901 Aflatoxin exposure in utero causes growth faltering in Gambian infants. *Int. J. Epidemiol.*  
902 36, 1119–1125. <https://doi.org/10.1093/ije/dym122>.
- 903 Turner, P.C., Flannery, B., Isitt, C., Ali, M., Pestka, J., 2012a. The role of biomarkers in  
904 evaluating human health concerns from fungal contaminants in food. *Nutr. Res. Rev.* 25,  
905 162–179. <http://doi.org/10.1017/S095442241200008X>.

- 906 Turner, P.C., Gong, Y.Y., Pourshams, A., Jafaric, E., Routledge, M.N., Malekzadeh, R., et al.,  
907 2012b. A pilot survey for *Fusarium* mycotoxin biomarkers in women from Golestan,  
908 northern Iran. *World Mycotoxin J.* 5, 195–199. <https://doi.org/10.3920/WMJ2011.1337>.
- 909 Turner, P.C., Hopton, R., Lecluse, Y., White, K.L.M., Fisher, J., Lebailly, P., 2010. Determinants  
910 of urinary deoxynivalenol in male farmers from Normandy, France. *J. Agric. Food Chem.*  
911 58, 5206–5212. <https://doi.org/10.1021/jf100892v>.
- 912 Turner, P.C., Moore, S.E., Hall, A.J., Prentice, A.M., Wild, C.P., 2003. Modification of immune  
913 function through exposure to dietary aflatoxin in Gambian children. *Environ. Health*  
914 *Perspect.* 111, 217–220. <https://doi.org/10.1289/ehp.5753>.
- 915 Turner, P.C., 2013. The molecular epidemiology of chronic aflatoxin driven impaired child  
916 growth. *Scientifica.* 2013, 152879. <http://doi.org/10.1155/2013/152879>.
- 917 Vejdovszky, K., Hahn, K., Braun, D., Warth, B., Marko, D., 2017a. Synergistic estrogenic effects  
918 of *Fusarium* and *Alternaria* mycotoxins *in vitro*. *Arch. Toxicol.* 91(3), 1447–1460.  
919 <https://doi.org/10.1007/s00204-016-1795-7>.
- 920 Vejdovszky, K., Schmidt, V., Warth, B., Marko, D., 2017b. Combinatory estrogenic effects  
921 between the isoflavone genistein and the mycotoxins zearalenone and alternariol *in*  
922 *vitro*. *Mol. Nutr. Food Res.* 61(3), 1600526. <https://doi.org/10.1002/mnfr.201600526>.
- 923 Vidal, A., Mengelers, M., Yang, S., De Saeger, S., De Boevre, M., 2018. Mycotoxin biomarkers  
924 of exposure: a comprehensive review. *Compr. Rev. Food Sci. Food Saf.* 17(5), 1127–  
925 1155. <https://doi.org/10.1111/1541-4337.12367>.
- 926 Wang, J.-S., Huang, T., Su, J., Liang, F., Wei, Z., Liang, Y., et al., 2001. Hepatocellular  
927 carcinoma and aflatoxin exposure in Zhuqing village Fusui county, People's Republic of  
928 China. *Cancer Epidemiol. Biomarkers Prev.* 10, 143–146.
- 929 Warth, B., Braun, D., Ezekiel, C.N., Turner, P.C., Degen, G.H., Marko, D., 2016. Biomonitoring  
930 of mycotoxins in human breast milk: current state and future perspectives. *Chem. Res.*  
931 *Toxicol.* 29(7), 1087–1097. <https://doi.org/10.1021/acs.chemrestox.6b00125>.
- 932 Warth, B., Preindl, K., Manser, P., Wick, P., Marko, D., Buerki-Thurnherr, T., 2019. Transfer and  
933 metabolism of the xenoestrogen zearalenone in human perfused placenta. *Environ.*  
934 *Health Perspect.* 127(10), 107004. <https://doi.org/10.1289/EHP4860>.

- 935 Warth, B., Sulyok, M., Krska, R., 2013. LC-MS/MS-based multibiomarker approaches for the  
936 assessment of human exposure to mycotoxins. *Anal. Bioanal. Chem.* 405(17), 5687–  
937 5695. <https://doi.org/10.1007/s00216-013-7011-1>.
- 938 Watson, S., Moore, S., Darboe, M.K., Chen, G., Tu, Y.-K., Huang, Y.-T., et al., 2018. Impaired  
939 growth in rural Gambian infants exposed to aflatoxin: a prospective cohort study. *BMC.*  
940 *Public Health.* 18, 1247. <https://doi.org/10.1186/s12889-018-6164-4>.
- 941 Wild, C.P., Turner, P.C., 2002. The toxicology of aflatoxins as a basis for public health  
942 decisions. *Mutagenesis.* 17, 471–481. <https://doi.org/10.1093/mutage/17.6.471>.
- 943 Woelflingseder, L., Warth, B., Vierheilig, I., Schwartz-Zimmermann, H., Hametner, C., Nagl, V.,  
944 et al., 2019. The *Fusarium* metabolite culmorin suppresses the *in vitro* glucuronidation of  
945 deoxynivalenol. *Arch. Toxicol.* 93(6), 1729–1743. [https://doi.org/10.1007/s00204-019-](https://doi.org/10.1007/s00204-019-02459-w)  
946 02459-w.
- 947 Wu, X., Jackson, R.T., Khan, S.A., Ahuja, J., Pehrsson, P.R., 2018. Human milk nutrient  
948 composition in the United States: current knowledge, challenges, and research needs.  
949 *Curr. Develop. Nutr.* 2(7), nzy025. <https://doi.org/10.1093/cdn/nzy025>.
- 950 Yoshizawa, T., Yamashita, A., Luo, Y., 1994. Fumonisin occurrence in corn from high- and low-  
951 risk areas for human esophageal cancer in China. *Appl. Environ. Microbiol.* 60, 1626–  
952 1629.

953 **Table captions:**

954 **Table 1.** Demographic characteristics and food preference of study participants.

955 **Table 2.** Mycotoxins in breast milk ( $n=22$ ) consumed by exclusively breastfed infants in Ogun  
956 state, Nigeria.

957 **Table 3.** Mycotoxins in plate-ready complementary food fed to non-exclusively breastfed infants  
958 in Ogun state, Nigeria.

959 **Table 4.** Mycotoxins in urines of exclusively breastfed (EB) and non-exclusively breastfed (NEB)  
960 infants in Ogun state, Nigeria.

961 **Table 5.** Co-occurrence of mycotoxin classes<sup>a</sup> in breast milk, complementary food and urine.

962

963 **Table S1.** Fungal metabolites in plate-ready complementary food fed to non-exclusively  
964 breastfed infants in Ogun state, Nigeria.

965 **Figure captions:**

966 **Figure 1.** MRM-chromatograms of a matrix-matched standard in urine (A), and an infant urine  
967 sample (B) of aflatoxin Q<sub>1</sub> (AFQ<sub>1</sub>) and dihydrocitrinone (DHC), respectively. In addition,  
968 MRM-chromatograms of a matrix-matched standard in breast milk (C) and a breast milk  
969 sample (D) of DHC and sterigmatocystin (STER), respectively, are shown. Quantifier,  
970 qualifier and retention time are given for each mycotoxin: AFQ<sub>1</sub> (*m/z* 329.0–282.9; *m/z*  
971 329.0–175.0; RT: 15.1 min) and DHC (*m/z* 265.0–221.1; *m/z* 265.0–246.9; RT: 16.1 min)  
972 in urine; DHC (*m/z* 265.0–177.0; *m/z* 265.0–203.0; RT: 4.5 min) and STER (*m/z* 325.1–  
973 281.1; *m/z* 325.1–310.2; RT: 8.1 min) in breast milk.

974 **Figure 2.** Scatter plot for percentage increases in detection frequencies and means of detects  
975 of mycotoxins in urine of non-exclusively breastfed (NEB) vs. exclusively breastfed (EB)  
976 infants in Ogun state, Nigeria. Numerals on x-axis denote mycotoxins: 1 = aflatoxin M<sub>1</sub>; 2  
977 = aflatoxin Q<sub>1</sub>; 3 = deoxynivalenol; 4 = dihydrocitrinone; 5 = fumonisin B<sub>1</sub>; 6 = ochratoxin  
978 A; 7 = zearalenone; 8 = β-zearalenol.

979 **Figure 3.** MRM-chromatogram of one non-exclusively breastfed infant urine sample from Ogun  
980 state, Nigeria, containing a mixture of seven mycotoxins belonging to six mycotoxin  
981 classes. Quantifier, qualifier, internal standard (IS) and retention time are given for each  
982 mycotoxin: DON (*m/z* 355.1–246.9; *m/z* 355.1–137.9; *m/z* 370.1–278.8; RT: 9.0 min),  
983 AFQ<sub>1</sub> (*m/z* 329.0–282.9; *m/z* 329.0–175.0; no IS; RT: 15.0 min), AFM<sub>1</sub> (*m/z* 329.1–  
984 273.2; *m/z* 329.1–229.1; *m/z* 346.0–288.2; RT: 15.1 min), FB<sub>1</sub> (*m/z* 722.5–334.4; *m/z*  
985 722.5–352.3; *m/z* 756.3–356.3; RT: 15.1 min), DHC (*m/z* 265.0–221.1; *m/z* 265.0–246.9;  
986 no IS; RT: 15.9 min), OTA (*m/z* 404.0–239.0; *m/z* 404.0–358.0; *m/z* 424.2–250.1; RT:  
987 20.6 min), and ZEN (*m/z* 317.1–175.0; *m/z* 317.1–131.0; *m/z* 335.2–185.1; RT: 20.8  
988 min).

989 **Table 1.** Demographic characteristics and food preference of study participants.

| Characteristics                               | All           | Exclusively breastfed | Non-exclusively breastfed |
|-----------------------------------------------|---------------|-----------------------|---------------------------|
| Subjects ( <i>n</i> (%))                      | 65            | 23 (35.4)             | 42 (64.6)                 |
| Gender ( <i>n</i> (%))                        |               |                       |                           |
| Male                                          | 31 (47.7)     | 11 (47.8)             | 20 (47.6)                 |
| Female                                        | 34 (52.3)     | 12 (52.2)             | 22 (52.4)                 |
| Age (months)                                  |               |                       |                           |
| Mean $\pm$ SD <sup>a</sup>                    | 7.1 $\pm$ 3.9 | 3.7 $\pm$ 1.6         | 9.0 $\pm$ 3.6*            |
| Range                                         | 1–18          | 1–6                   | 3–18                      |
| Body weight (kg)                              |               |                       |                           |
| Mean $\pm$ SD <sup>a</sup>                    | 7.4 $\pm$ 1.7 | 6.3 $\pm$ 1.0         | 8.0 $\pm$ 1.6**           |
| Range                                         | 4.5–11.2      | 4.5–8.0               | 5.0–11.2                  |
| Frequency of food consumption/day             |               |                       |                           |
| Breast milk                                   | 1–>10         | 8–>10 <sup>b</sup>    | 1–3                       |
| Complementary food                            | 3–5           | 0                     | 3–5                       |
| Complementary food ( <i>n</i> (%)) preference |               |                       |                           |
| Single food (e.g. <i>ogi</i> )                | 3 (4.6)       | 0 (0)                 | 3 (7.1)                   |
| Mixed foods <sup>c</sup>                      | 39 (60.0)     | 0 (0)                 | 39 (92.9)                 |

990 <sup>a</sup>Standard deviation.

991 <sup>b</sup>As reported by Braun et al. (2018).

992 <sup>c</sup>Combination of complementary foods (e.g. infant cereal, *ogi* and *Tombran*) consumed in a day.

993 \*Significant at  $p < 0.01$ , \*\*  $p < 0.05$

994 **Table 2.** Mycotoxins in breast milk ( $n = 22$ ) consumed by exclusively breastfed infants in Ogun  
 995 state, Nigeria.

| Mycotoxins                   | LOD<br>(ng/L) | LOQ<br>(ng/L) | $N$ (%) <sup>a</sup> | Concentration (ng/L)    |        |      |
|------------------------------|---------------|---------------|----------------------|-------------------------|--------|------|
|                              |               |               |                      | Range                   | Median | Mean |
| Aflatoxin M <sub>1</sub>     | 2.0           | 4.0           | 4 (18.2)             | 2.0 <sup>b</sup>        | 2.0    | 2.0  |
| Alternariol monomethyl ether | 0.5           | 1.0           | 21 (95.5)            | 0.5 <sup>b</sup> –11.7  | 1.8    | 3.0  |
| Beauvericin                  | 0.1           | 0.3           | 22 (100)             | 1.0–12.0                | 2.2    | 3.0  |
| Dihydrocitrinone             | 14.0          | 28.0          | 6 (27.3)             | 14.0 <sup>b</sup> –59.7 | 14.0   | 25.2 |
| Enniatin B                   | 0.7           | 1.4           | 16 (72.7)            | 0.7 <sup>b</sup> –10.1  | 4.6    | 5.0  |
| Enniatin B <sub>1</sub>      | 0.5           | 1.0           | 5 (22.7)             | 0.5 <sup>b</sup> –1.15  | 0.5    | 0.6  |
| Ochratoxin A                 | 2.0           | 4.0           | 14 (63.6)            | 2.0 <sup>b</sup> –67.6  | 2.0    | 9.6  |
| Ochratoxin B                 | 2.5           | 5.0           | 2 (9.1)              | 5.3–6.7                 | 6.0    | 6.0  |
| Sterigmatocystin             | 0.5           | 1.0           | 1 (4.6)              | 1.2                     | 1.2    | 1.2  |

996 <sup>a</sup>Number (and percentage) of samples containing the mycotoxin.

997 <sup>b</sup><LOQ values were considered as positive data and substituted with LOQ/2.



998 **Table 3.** Mycotoxins in plate-ready complementary food fed to non-exclusively breastfed infants in Ogun state, Nigeria.

| Mycotoxins                         | LOD (µg/kg) | LOQ (µg/kg) | All samples (n=42) |                    |                       | Infant cereal (n=6) |                   | Ogi (n=26) |                   | Tombran (n=10) |                   |
|------------------------------------|-------------|-------------|--------------------|--------------------|-----------------------|---------------------|-------------------|------------|-------------------|----------------|-------------------|
|                                    |             |             | N (%) <sup>a</sup> | Range <sup>b</sup> | Mean <sup>b</sup> ±SD | N                   | Mean <sup>b</sup> | N          | Mean <sup>b</sup> | N              | Mean <sup>b</sup> |
| Aflatoxin B <sub>1</sub>           | 0.24        | 0.72        | 9 (21.4)           | 1.0–7.0            | 3.0 ± 2.0             | 0                   | <LOD              | 6          | 2.5               | 3              | 4.1               |
| Aflatoxin B <sub>2</sub>           | 0.4         | 1.2         | 1 (2.4)            | 1.2                | 1.2                   | 0                   | <LOD              | 0          | <LOD              | 1              | 1.2               |
| Aflatoxin G <sub>1</sub>           | 0.32        | 0.96        | 2 (4.8)            | 12.0–12.1          | 12.1 ± 0.0            | 0                   | <LOD              | 2          | 12.1              | 0              | <LOD              |
| <b>Total aflatoxin<sup>c</sup></b> | -           | -           | <b>9 (21.4)</b>    | <b>1.0–16.2</b>    | <b>5.8 ± 6.3</b>      | <b>0</b>            | <b>&lt;LOD</b>    | <b>6</b>   | <b>6.5</b>        | <b>3</b>       | <b>4.5</b>        |
| Beauvericin                        | 0.008       | 0.024       | 33 (78.6)          | 0.1–116            | 3.8 ± 20.1            | 6                   | 19.4              | 19         | 0.3               | 8              | 0.3               |
| Deoxynivalenol                     | 1.2         | 3.6         | 2 (4.8)            | 52.9–61.5          | 57.2 ± 6.1            | 1                   | 52.9              | 1          | 61.5              | 0              | <LOD              |
| Enniatin A <sub>1</sub>            | 0.032       | 0.096       | 7 (16.7)           | 0.1–5.7            | 1.3 ± 2.0             | 2                   | 3.3               | 1          | 0.9               | 4              | 0.4               |
| Enniatin B                         | 0.024       | 0.072       | 8 (19.0)           | 0.03–6.9           | 2.1 ± 3.0             | 2                   | 6.9               | 1          | 1.1               | 5              | 0.4               |
| Enniatin B <sub>1</sub>            | 0.04        | 0.12        | 6 (14.3)           | 0.4–14.3           | 4.1 ± 5.3             | 2                   | 9.6               | 1          | 2.2               | 3              | 1.1               |
| Enniatin B <sub>2</sub>            | 0.04        | 0.12        | 3 (7.1)            | 0.09–0.34          | 0.22 ± 0.13           | 2                   | 0.29              | 0          | <LOD              | 1              | 0.09              |
| Fumonisin A <sub>1</sub>           | 2           | 6.0         | 1 (2.4)            | 2.0                | 2.0                   | 0                   | <LOD              | 1          | 2.0               | 0              | <LOD              |
| Fumonisin B <sub>1</sub>           | 3.2         | 9.6         | 11 (26.2)          | 13.8–114           | 35.6 ± 32.2           | 2                   | 54.2              | 7          | 35.3              | 2              | 18.0              |
| Fumonisin B <sub>2</sub>           | 2.4         | 7.2         | 8 (19.0)           | 7.9–80.3           | 24.3 ± 24.0           | 1                   | 17.8              | 6          | 26.7              | 1              | 15.8              |
| <b>Total fumonisin<sup>d</sup></b> | -           | -           | <b>12 (28.6)</b>   | <b>7.9–194</b>     | <b>48.8 ± 52.9</b>    | <b>2</b>            | <b>63.1</b>       | <b>8</b>   | <b>50.9</b>       | <b>2</b>       | <b>25.9</b>       |
| Moniliformin                       | 1.6         | 4.8         | 3 (7.1)            | 7.2–10.6           | 8.6 ± 1.8             | 0                   | <LOD              | 0          | <LOD              | 3              | 8.6               |
| Zearalenone                        | 0.12        | 0.36        | 4 (9.5)            | 0.5–6.8            | 2.4 ± 3.0             | 1                   | 0.6               | 2          | 1.1               | 1              | 6.8               |

999 <sup>a</sup>Number (and percentage) of samples containing the mycotoxin. <sup>b</sup>Mean (and standard deviation) of mycotoxin concentrations expressed in µg/kg.

1000 <sup>c</sup>Sum of aflatoxins B<sub>1</sub>, B<sub>2</sub> and G<sub>1</sub>.

1001 <sup>d</sup>Sum of fumonisins B<sub>1</sub> and B<sub>2</sub>.

1002 **Table 4.** Mycotoxins in urines of exclusively breastfed (EB) and non-exclusively breastfed (NEB) infants in Ogun state, Nigeria.

| Mycotoxins               | LOD<br>(ng/L) | LOQ<br>(ng/L) | Quantified levels (ng/L)              |            |                   |                                           |            |                   |
|--------------------------|---------------|---------------|---------------------------------------|------------|-------------------|-------------------------------------------|------------|-------------------|
|                          |               |               | Exclusively breastfed ( <i>n</i> =23) |            |                   | Non-exclusively breastfed ( <i>n</i> =42) |            |                   |
|                          |               |               | <i>N</i> (%) <sup>a</sup>             | Range      | Mean <sup>b</sup> | <i>N</i> (%) <sup>a</sup>                 | Range      | Mean <sup>b</sup> |
| Aflatoxin M <sub>1</sub> | 0.3           | 1.0           | 1 (4)                                 | 23         | 23                | 5 (12)                                    | 32–505     | 166               |
| Aflatoxin Q <sub>1</sub> | 0.3           | 1.0           | 20 (87)                               | 3–791      | 182               | 24 (57)                                   | 14–898     | 225*              |
| Deoxynivalenol           | 50            | 150           | 7 (30)                                | 225–19,781 | 3194              | 23 (55)                                   | 226–21,344 | 5282*             |
| Dihydrocitrinone         | 3.0           | 10            | 6 (26)                                | 5–944      | 135               | 31 (74)                                   | 5–1,377    | 202*              |
| Fumonisin B <sub>1</sub> | 1.0           | 10            | 4 (17)                                | 35–188     | 136               | 13 (31)                                   | 47–1,587   | 454*              |
| Nivalenol                | 50            | 100           | <i>nd</i>                             | <i>nd</i>  | <i>nd</i>         | 1 (2)                                     | 161        | 161               |
| Ochratoxin A             | 0.3           | 1.0           | 6 (26)                                | 0.5–76     | 19*               | 16 (38)                                   | 0.5–34     | 9                 |
| Zearalenone              | 1.0           | 3.0           | 13 (57)                               | 17–784     | 148               | 35 (83)                                   | 13–678     | 140               |
| α-Zearalenol             | 3.0           | 10            | <i>nd</i>                             | <i>nd</i>  | <i>nd</i>         | 7 (17)                                    | 5–55       | 20                |
| β-Zearalenol             | 1.0           | 3.0           | 7 (30)                                | 8–648      | 122               | 6 (14)                                    | 14–68      | 32                |

1003 <sup>a</sup>Number (percentage) of children with quantifiable mycotoxin levels in urine.

1004 <sup>b</sup>Mean values were calculated to include <LOQ data points substituted with half LOQ.

1005 \*Significant at *p*<0.05.

1006

1007 **Table 5.** Co-occurrence of mycotoxin classes<sup>a</sup> in breast milk, complementary food and urine.

| Numbers of<br>mycotoxins | Incidence [ <i>N</i> (%)] <sup>b</sup> in infant's food |                      | Incidence [ <i>N</i> (%)] <sup>b</sup> in infant's urine |                                              |                     |
|--------------------------|---------------------------------------------------------|----------------------|----------------------------------------------------------|----------------------------------------------|---------------------|
|                          | Complementary                                           |                      | Exclusively breastfed<br>( <i>n</i> =23)                 | Non-exclusively breastfed<br>( <i>n</i> =42) | All ( <i>n</i> =65) |
|                          | Breast milk ( <i>n</i> =22)                             | food ( <i>n</i> =42) |                                                          |                                              |                     |
| 0                        | 0 (0)                                                   | 0 (0)                | 1 (4.3)                                                  | 0 (0)                                        | 1 (1.5)             |
| 1                        | 0 (0)                                                   | 20 (47.6)            | 5 (21.7)                                                 | 3 (7)                                        | 8 (12.3)            |
| 2                        | 3 (13.6)                                                | 13 (31.0)            | 5 (21.7)                                                 | 5 (11.9)                                     | 10 (15.4)           |
| 3                        | 5 (22.8)                                                | 4 (9.5)              | 3 (13.0)                                                 | 12 (28.6)                                    | 15 (23.1)           |
| 4                        | 9 (40.9)                                                | 4 (9.5)              | 7 (30.4)                                                 | 12 (28.6)                                    | 19 (29.2)           |
| 5                        | 2 (9.1)                                                 | 1 (2.4)              | 2 (8.7)                                                  | 9 (21.4)                                     | 11 (16.9)           |
| 6                        | 3 (13.6)                                                | 0 (0.0)              | 0 (0.0)                                                  | 1 (2.4)                                      | 1 (1.5)             |

1008 <sup>a</sup>Mycotoxin classes: aflatoxins (breast milk: AFM<sub>1</sub>; food: AFB<sub>1</sub>, AFB<sub>2</sub> and AFG<sub>1</sub>; urine: AFM<sub>1</sub> and AFQ<sub>1</sub>); alternariolmethylether; beauvericin; dihydrocitrinone;  
 1009 deoxynivalenol; dihydrocitrinone (breast milk and urine); enniatins (breastmilk: ENNB and ENNB<sub>1</sub>; food: ENNA<sub>1</sub>, ENNB, ENNB<sub>1</sub> and ENNB<sub>2</sub>); fumonisins (food: FB<sub>1</sub>  
 1010 and FB<sub>2</sub>; urine: FB<sub>1</sub>); moniliformin; nivalenol; ochratoxins (breast milk: OTA and OTB; urine: OTA); sterigmatocystin (breast milk); zearalenone (food: zearalenone;  
 1011 urine: zearalenone, α-zearalenol and β-zearalenol).

1012 <sup>b</sup>Number (and percentage) of samples containing co-occurring mycotoxin classes. <LOQ values were considered as positive data.

1013 **Table S1.** Fungal metabolites in plate-ready complementary food fed to non-exclusively breastfed infants in Ogun state, Nigeria.

| Metabolites              | LOD<br>(µg/kg) | All samples (n=42) |                    |                       | Infant cereal (n=6) |                   | Ogi (n=26) |                   | Tombran (n=10) |                   |
|--------------------------|----------------|--------------------|--------------------|-----------------------|---------------------|-------------------|------------|-------------------|----------------|-------------------|
|                          |                | N (%) <sup>a</sup> | Range <sup>b</sup> | Mean <sup>b</sup> ±SD | N                   | Mean <sup>b</sup> | N          | Mean <sup>b</sup> | N              | Mean <sup>b</sup> |
| 3-Nitropropionic acid    | 0.8            | 2 (4.76)           | 11.7-20.6          | 16.2±6.30             | 0                   | <LOD              | 2          | 16.2              | 0              | <LOD              |
| Agroclavine              | 0.12           | 4 (9.52)           | 12.6-532           | 243±216               | 0                   | <LOD              | 1          | 12.6              | 3              | 320               |
| Asperglaucide            | 0.08           | 31 (73.8)          | 0.08-90.3          | 9.87±22.1             | 6                   | 2.15              | 16         | 0.90              | 9              | 31.0              |
| Asperphenamate           | 0.04           | 24 (57.1)          | 0.06-32.2          | 4.11±8.90             | 2                   | 3.45              | 14         | 0.42              | 8              | 10.7              |
| Averantin                | 0.04           | 2 (4.76)           | 0.38-0.88          | 0.63±0.35             | 0                   | <LOD              | 2          | 0.63              | 0              | <LOD              |
| Averufin                 | 0.04           | 7 (16.7)           | 0.04-2.54          | 0.88±1.10             | 1                   | 0.04              | 4          | 1.34              | 2              | 0.38              |
| Brevianamid F            | 0.16           | 12 (28.6)          | 0.35-24.1          | 9.06±8.10             | 2                   | 9.39              | 5          | 3.18              | 5              | 14.8              |
| cyclo(L-Pro-L-Tyr)       | 0.8            | 26 (61.9)          | 0.81-25.9          | 7.00±8.13             | 7                   | 5.07              | 11         | 2.57              | 8              | 14.8              |
| cyclo(L-Pro-L-Val)       | 0.64           | 39 (92.9)          | 0.65-71.0          | 16.8±18.7             | 7                   | 22.6              | 22         | 8.35              | 10             | 31.2              |
| Elymoclavine             | 0.4            | 7 (16.7)           | 0.99-45.9          | 16.6±16.9             | 0                   | <LOD              | 2          | 1.10              | 5              | 22.8              |
| Emodin                   | 0.056          | 2 (4.76)           | 0.98-1.01          | 1.00±0.02             | 0                   | <LOD              | 2          | 1.00              | 0              | <LOD              |
| Fellutanine A            | 0.2            | 4 (9.52)           | 6.00-10.0          | 8.22±1.99             | 0                   | <LOD              | 2          | 7.89              | 2              | 8.55              |
| Festuclavine             | 0.08           | 3 (7.14)           | 2.65-4.74          | 3.53±1.08             | 0                   | <LOD              | 0          | <LOD              | 3              | 3.53              |
| Flavoglaucin             | 0.24           | 7 (16.7)           | 0.54-57.5          | 17.0±24.4             | 1                   | 0.67              | 2          | 52.3              | 4              | 3.43              |
| Kojic acid               | 16             | 9 (21.4)           | 17.0-956           | 142±306               | 0                   | <LOD              | 4          | 260               | 5              | 46.7              |
| Macrosporin              | 0.04           | 3 (7.14)           | 0.07-1.10          | 0.42±0.59             | 0                   | <LOD              | 0          | <LOD              | 3              | 0.42              |
| N-Benzoyl-Phenylalanine  | 0.064          | 22 (52.4)          | 0.33-11.9          | 2.03±3.13             | 2                   | 0.92              | 12         | 0.90              | 8              | 4.00              |
| Neoechinulin A           | 0.8            | 3 (7.14)           | 4.33-17.4          | 11.7±6.71             | 0                   | <LOD              | 2          | 15.5              | 1              | 4.33              |
| O-MethylSterigmatocystin | 0.12           | 2 (4.76)           | 0.35-0.41          | 0.38±0.04             | 0                   | <LOD              | 2          | 0.38              | 0              | <LOD              |
| Questiomycin A           | 2              | 1 (2.38)           | 5.58               | 5.58                  | 0                   | <LOD              | 1          | 5.58              | 0              | <LOD              |
| Quinolactacin A          | 0.08           | 5 (11.9)           | 0.10-0.66          | 0.35±0.25             | 1                   | 0.23              | 3          | 0.48              | 1              | 0.10              |
| Rugulusovin              | 0.64           | 9 (21.4)           | 0.71-8.33          | 3.72±2.79             | 1                   | 3.85              | 5          | 4.48              | 3              | 2.41              |
| Skyrin                   | 0.4            | 1 (2.38)           | 0.91               | 0.91                  | 0                   | <LOD              | 1          | 0.91              | 0              | <LOD              |
| Tryptophol               | 8              | 27 (64.3)          | 8.88-792           | 87.2±180              | 4                   | 49.0              | 14         | 88.7              | 9              | 102               |
| Versicolorin C           | 0.24           | 2 (4.76)           | 0.58-0.62          | 0.60±0.02             | 0                   | <LOD              | 2          | 0.60              | 0              | <LOD              |

<sup>a</sup>Number (percentage) of samples containing the metabolite.

<sup>a</sup>Concentrations expressed in µg/kg.

1014  
1015

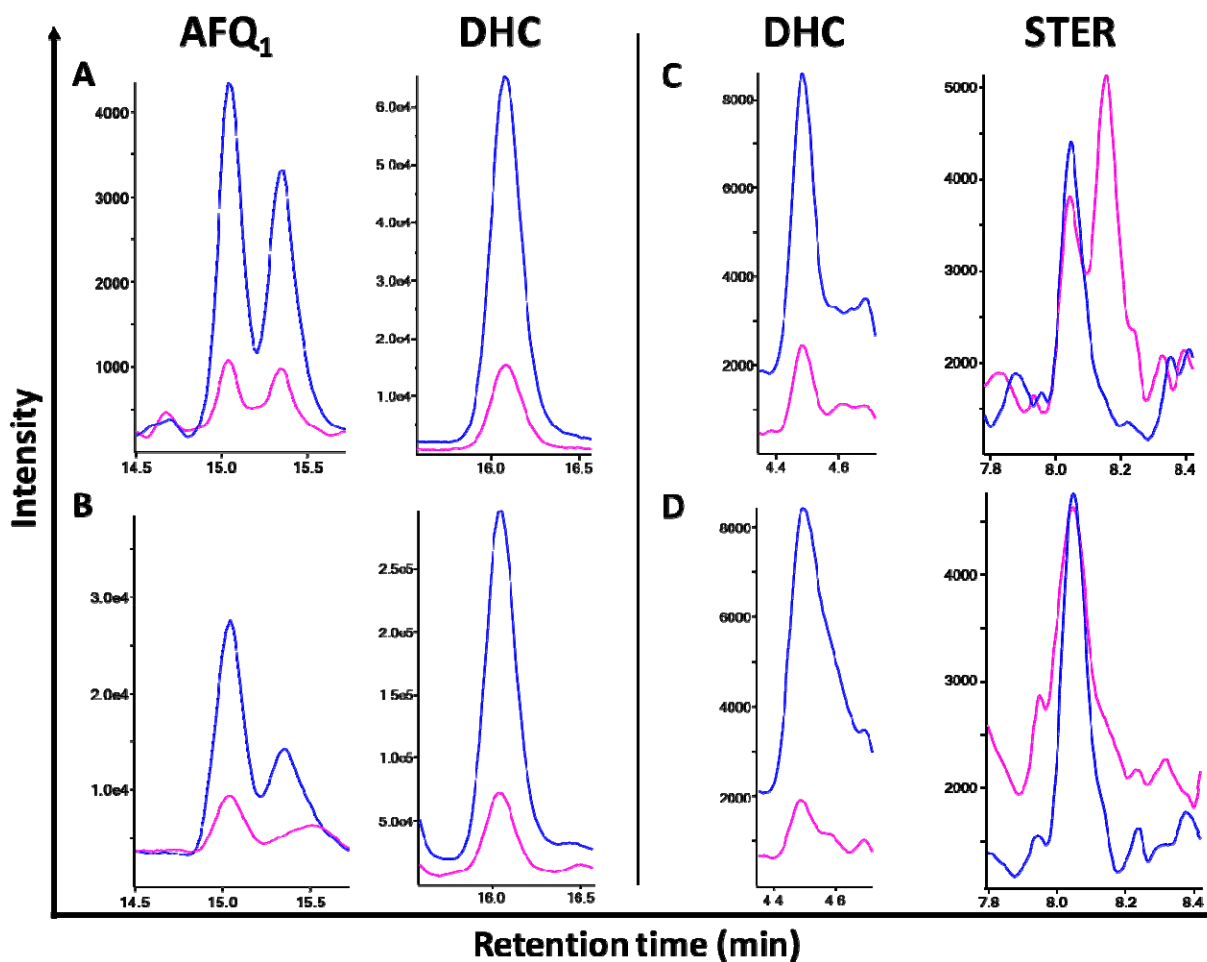

1016  
1017 **Figure 1.** MRM-chromatograms of a matrix-matched standard in urine (A), and an infant urine  
1018 sample (B) of aflatoxin Q<sub>1</sub> (AFQ<sub>1</sub>) and dihydrocitronone (DHC), respectively. In addition, MRM-  
1019 chromatograms of a matrix-matched standard in breast milk (C) and a breast milk sample (D) of  
1020 DHC and sterigmatocystin (STER), respectively, are shown. Quantifier, qualifier and retention  
1021 time are given for each mycotoxin: AFQ<sub>1</sub> (*m/z* 329.0–282.9; *m/z* 329.0–175.0; RT: 15.1 min) and  
1022 DHC (*m/z* 265.0–221.1; *m/z* 265.0–246.9; RT: 16.1 min) in urine; DHC (*m/z* 265.0–177.0; *m/z*  
1023 265.0–203.0; RT: 4.5 min) and STER (*m/z* 325.1–281.1; *m/z* 325.1–310.2; RT: 8.1 min) in  
1024 breast milk.

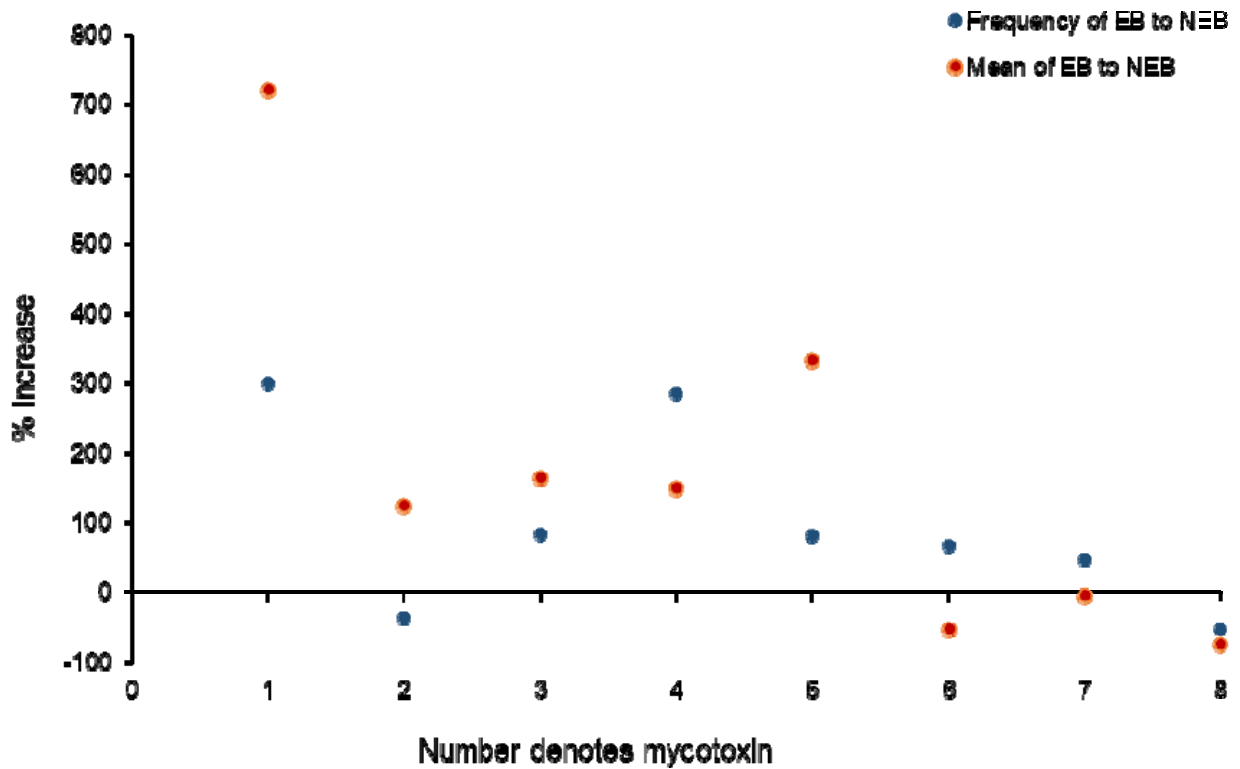

1025

1026 **Figure 2.** Scatter plot for percentage increases in detection frequencies and means of detects

1027 of mycotoxins in urine of non-exclusively breastfed (NEB) vs. exclusively breastfed (EB) infants

1028 in Ogun state, Nigeria. Numerals on x-axis denote mycotoxins: 1 = aflatoxin M<sub>1</sub>; 2 = aflatoxin Q<sub>1</sub>;

1029 3 = deoxynivalenol; 4 = dihydrocitrinone; 5 = fumonisin B<sub>1</sub>; 6 = ochratoxin A; 7 = zearalenone; 8

1030 =  $\beta$ -zearalenol.

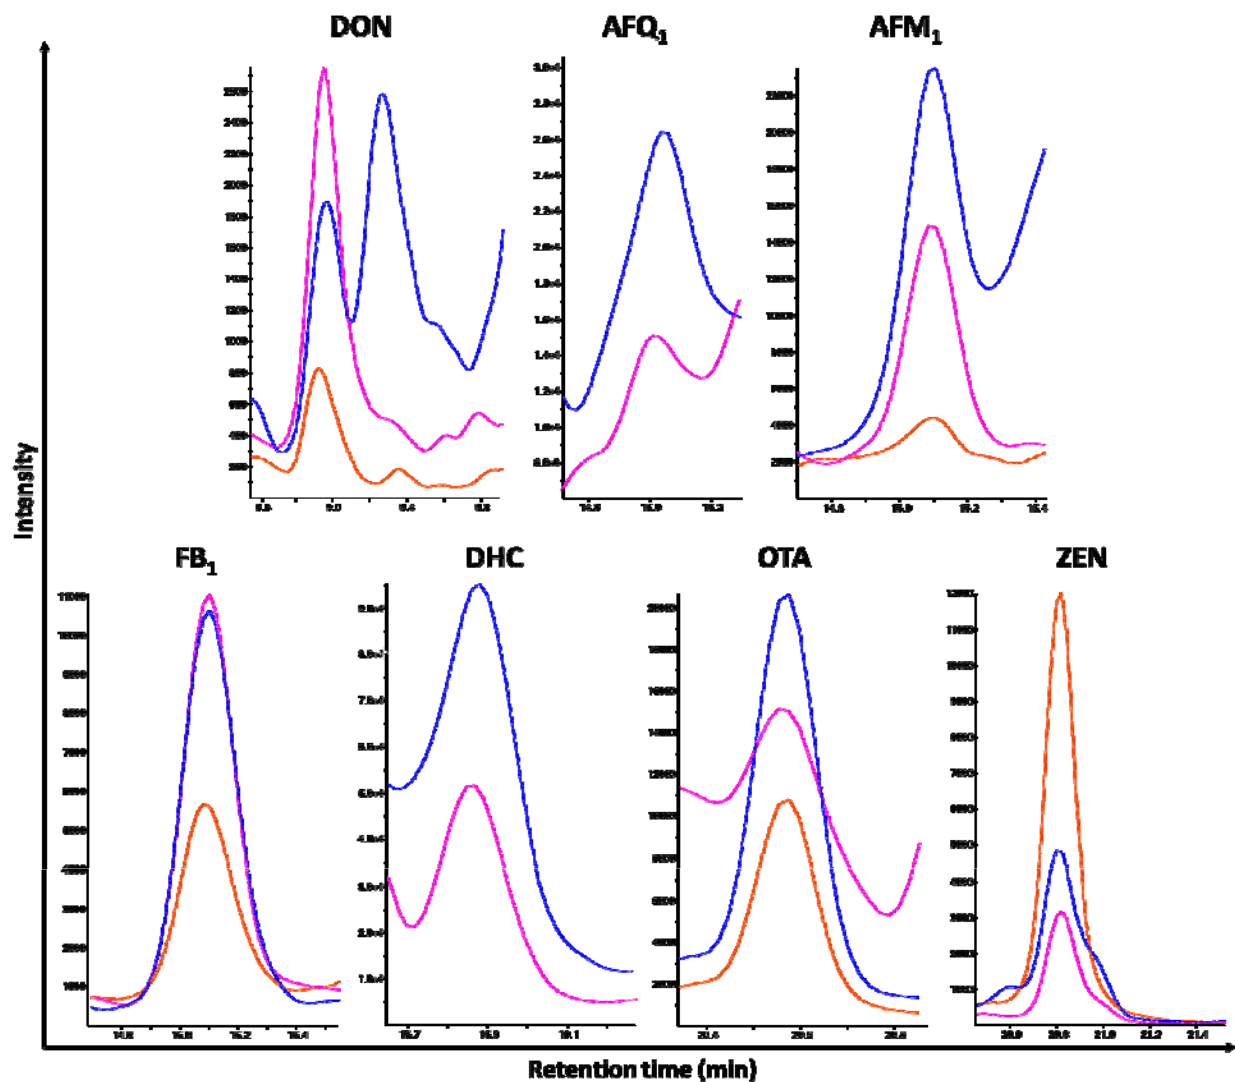

1031

1032 **Figure 3.** MRM-chromatogram of one non-exclusively breastfed infant urine sample from Ogun

1033 state, Nigeria, containing a mixture of seven mycotoxins belonging to six mycotoxin classes.

1034 Quantifier, qualifier, internal standard (IS) and retention time are given for each mycotoxin: DON

1035 (*m/z* 355.1–246.9; *m/z* 355.1–137.9; *m/z* 370.1–278.8; RT: 9.0 min), AFQ<sub>1</sub> (*m/z* 329.0–282.9;

1036 *m/z* 329.0–175.0; no IS; RT: 15.0 min), AFM<sub>1</sub> (*m/z* 329.1–273.2; *m/z* 329.1–229.1; *m/z* 346.0–

1037 288.2; RT: 15.1 min), FB<sub>1</sub> (*m/z* 722.5–334.4; *m/z* 722.5–352.3; *m/z* 756.3–356.3; RT: 15.1 min),

1038 DHC (*m/z* 265.0–221.1; *m/z* 265.0–246.9; no IS; RT: 15.9 min), OTA (*m/z* 404.0–239.0; *m/z*

1039 404.0–358.0; *m/z* 424.2–250.1; RT: 20.6 min), and ZEN (*m/z* 317.1–175.0; *m/z* 317.1–131.0;

1040 *m/z* 335.2–185.1; RT: 20.8 min).
